# Supplementary material for: Observing glacier elevation changes from spaceborne optical and radar sensors – an inter-comparison experiment using ASTER and TanDEM-X data
Source: Copernicus journal article supplement (doi:10.5194/tc-18-3195-2024), 2024-07-16
Supplement: Supplementary file 1 [file tc-18-3195-2024-supplement.pdf]

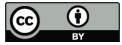

*Supplement of*

## **Observing glacier elevation changes from spaceborne optical and radar sensors – an inter-comparison experiment using ASTER and TanDEM-X data**

**Livia Piermattei et al.**

*Correspondence to:* Livia Piermattei ([livia.piermattei@geo.uzh.ch](mailto:livia.piermattei@geo.uzh.ch))

The copyright of individual parts of the supplement might differ from the article licence.

The supplemental materials complement the manuscript by including Figures and Tables that describe the validation data and spaceborne results submitted by the groups. Figure S1-S5 show the airborne validation DEMs of the three study sites, with their respective stable areas, and elevation change maps between the DEMs for the target validation period. Furthermore, the supplementary tables present a summary of the airborne validation data and the processing procedures for Hintereis (Table S1), Aletsch (Table S2), and Vestisen (Table S3). Tables S4–S15 encompass the experiment spaceborne results submitted by each group, outlining the workflows and processing strategies employed. An overview of the validation and spaceborne results is provided for Hintereis (Table S16), Aletsch (Table S17), Vestisen (Table S18), Baltoro (Table S19-S20 for periods 1 and 2, respectively), and the Northern Patagonian Icefield (Table S21-S22 for periods 1 and 2, respectively).

## Supplement Figures

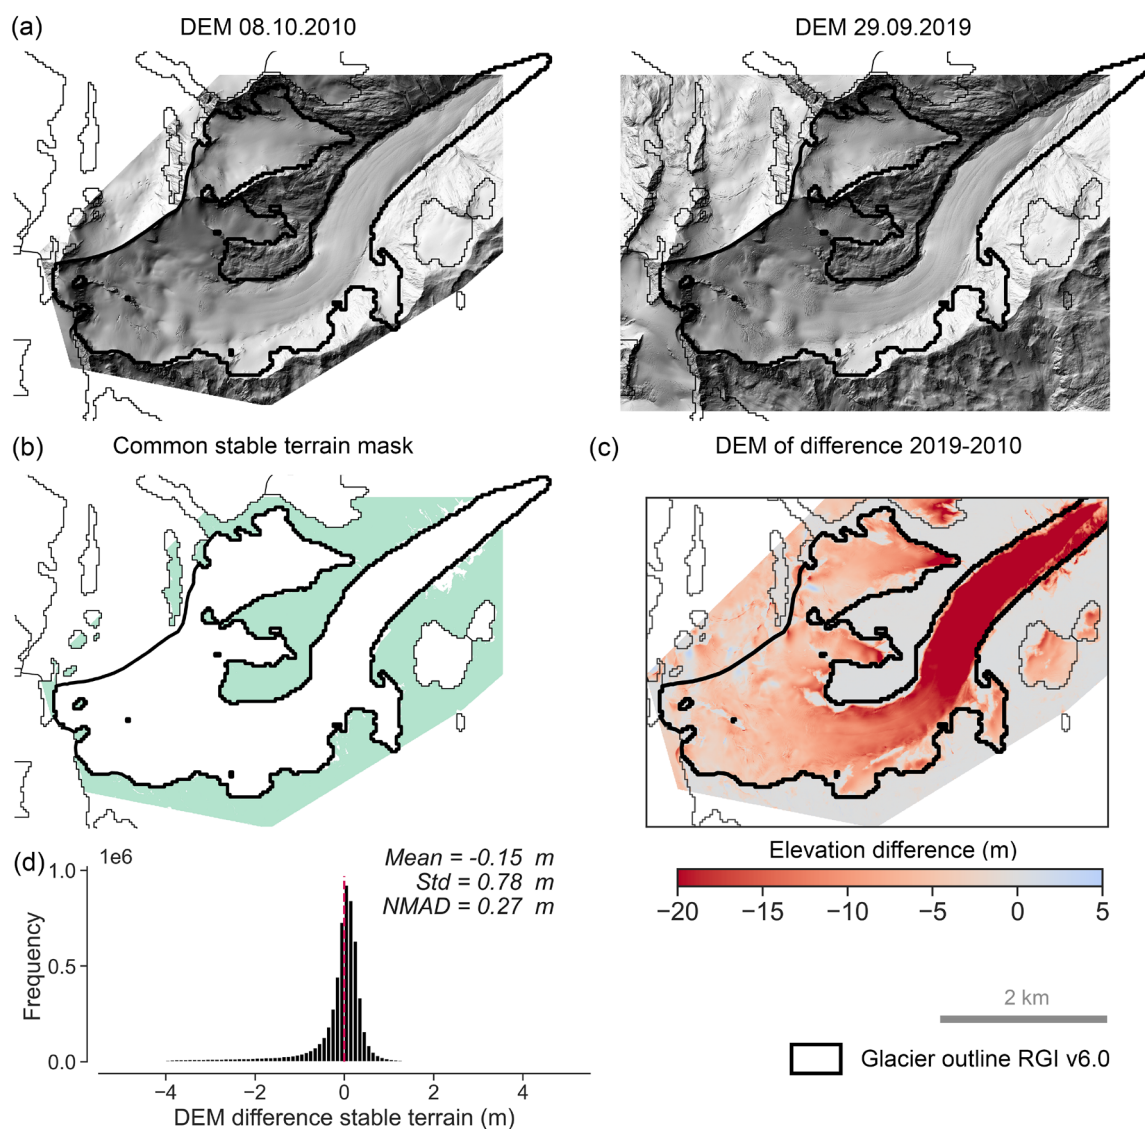

**Figure S1: Airborne lidar validation DEM for Hintereis. a) Hillshaded DEMs from 8 October 2010 and 29 September 2019. b) The stable terrain mask common to both DEMs used for co-registration and uncertainty assessment. c) Elevation change in metres between the 2019 and 2010 DEMs and d) the distribution of elevation differences on stable terrain with the main statistics.**

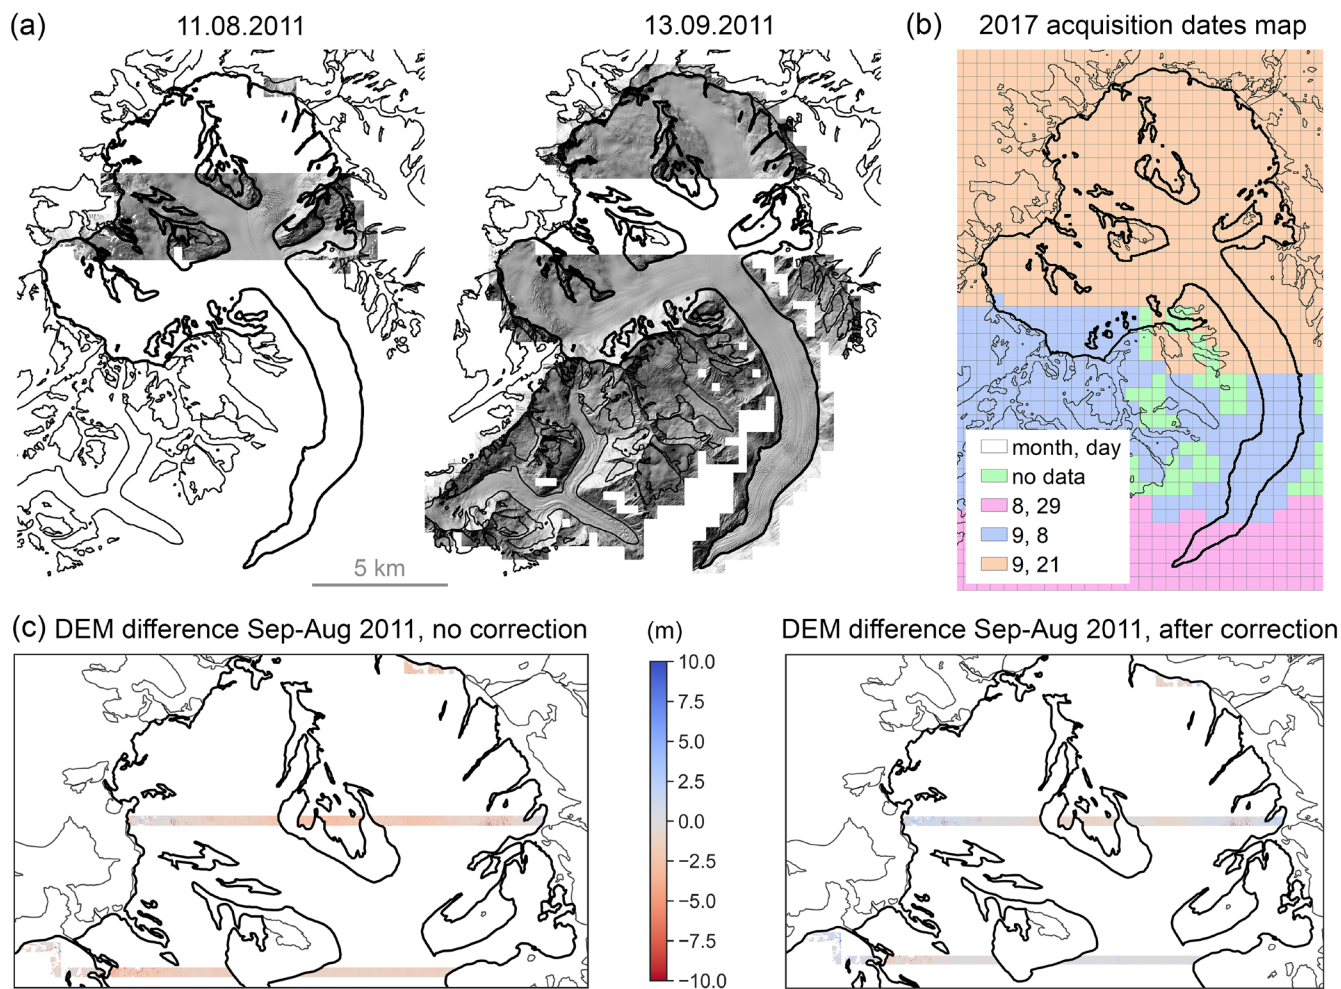

**Figure S2:** Map of the different acquisition dates of the airborne validation DEMs of Aletsch for the years 2011 and 2017. a) Two overlapping DEM tiles from 11 August 2011 and 13 September 2011. b) A map displaying the acquisition dates of the 2017 airborne flight. c) Elevation differences between September and August 2011 on their overlapping areas, before (left) and after (right) elevation correction (Table S2).

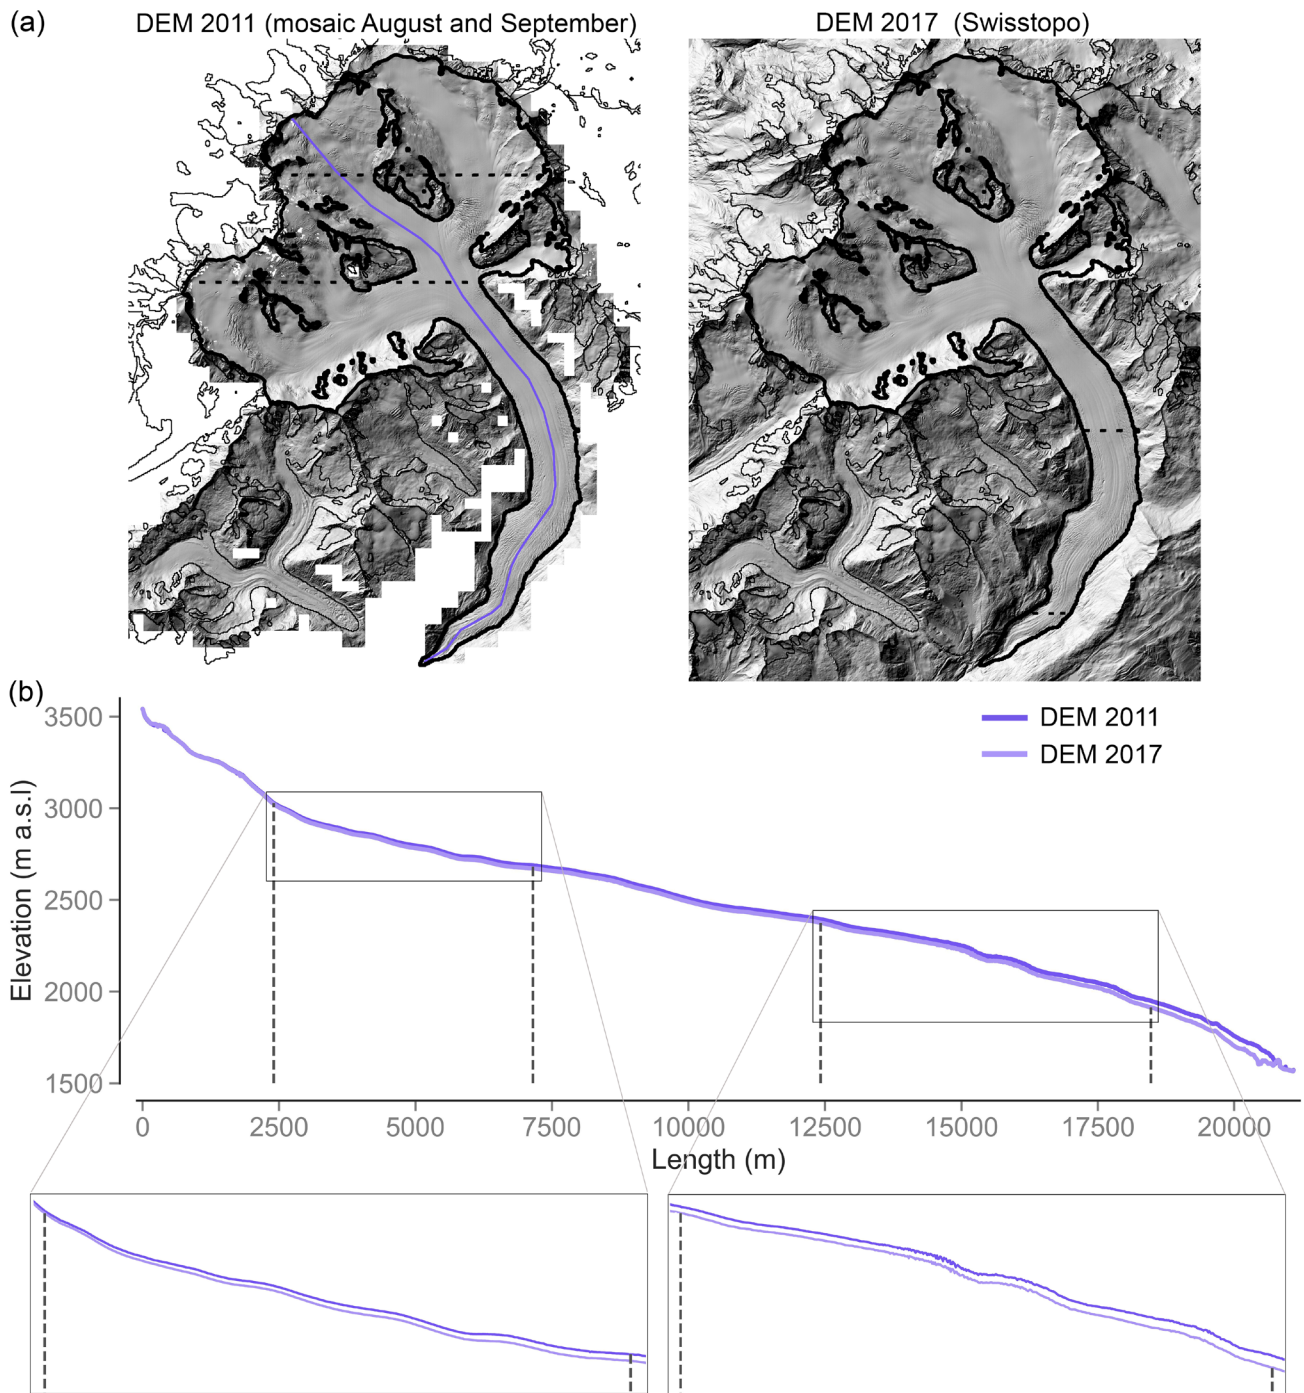

**Figure S3: (a)** Airborne validation DEMs of Aletsch for 2011 (after correction and mosaic) and 2017, provided by Swisstopo. **(b)** Longitudinal profile along the glacier centreline with dashed black lines indicating the August 2011 DEM location and the 2017 acquisition dates. The inset provides an enlarged view of the DEM profile at the edge of the different survey dates.



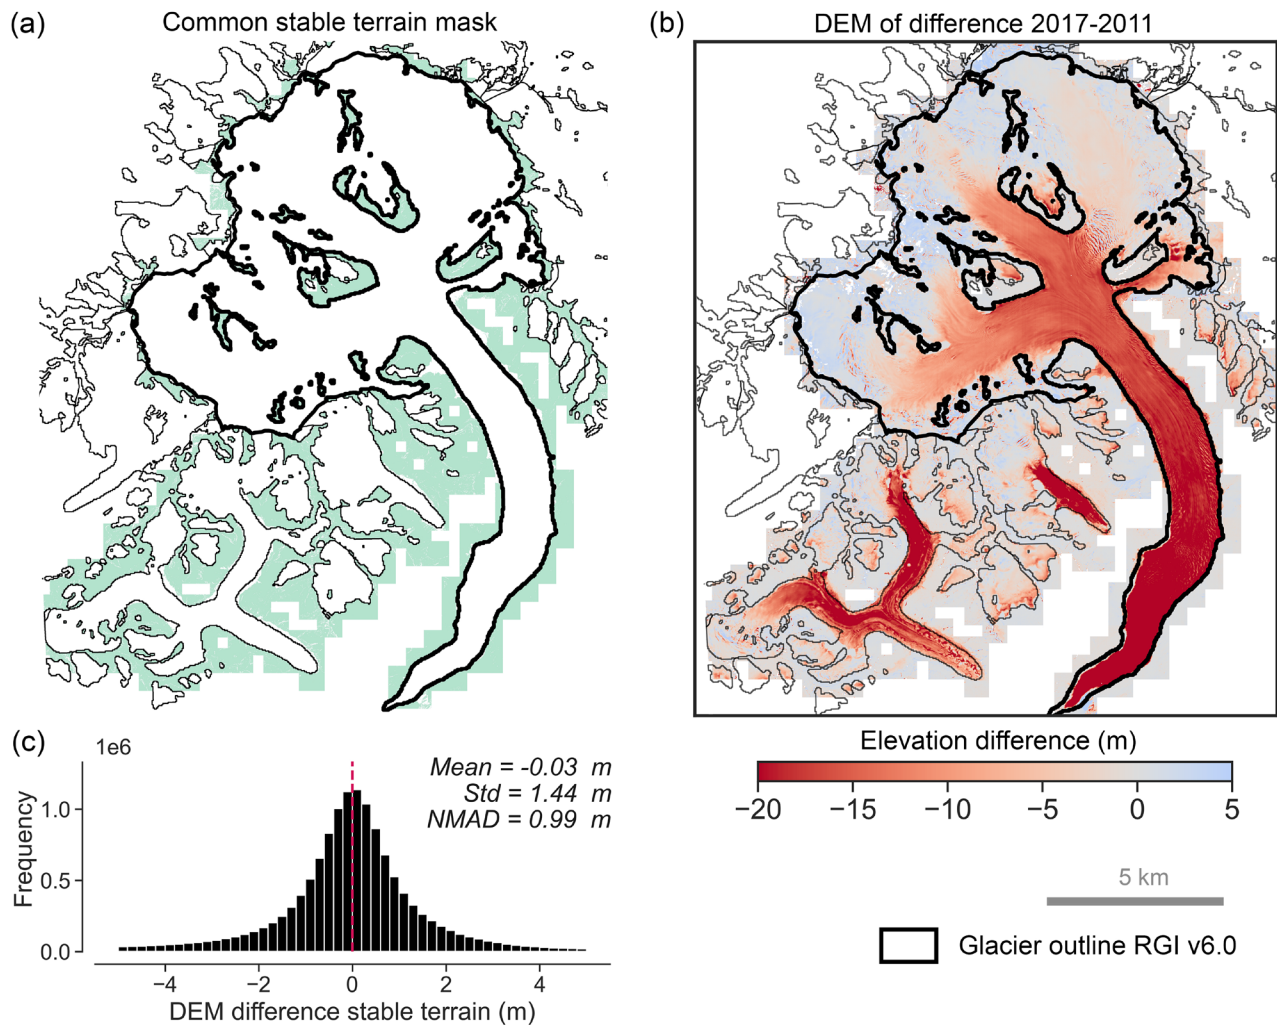

**Figure S4: Airborne lidar validation DEM for Aletsch Glacier. (a) The stable terrain mask used for uncertainty assessment and (b) elevation change in metres between the 2017 and 2011 DEMs. (c) The distribution of elevation differences on stable terrain with the main statistics**

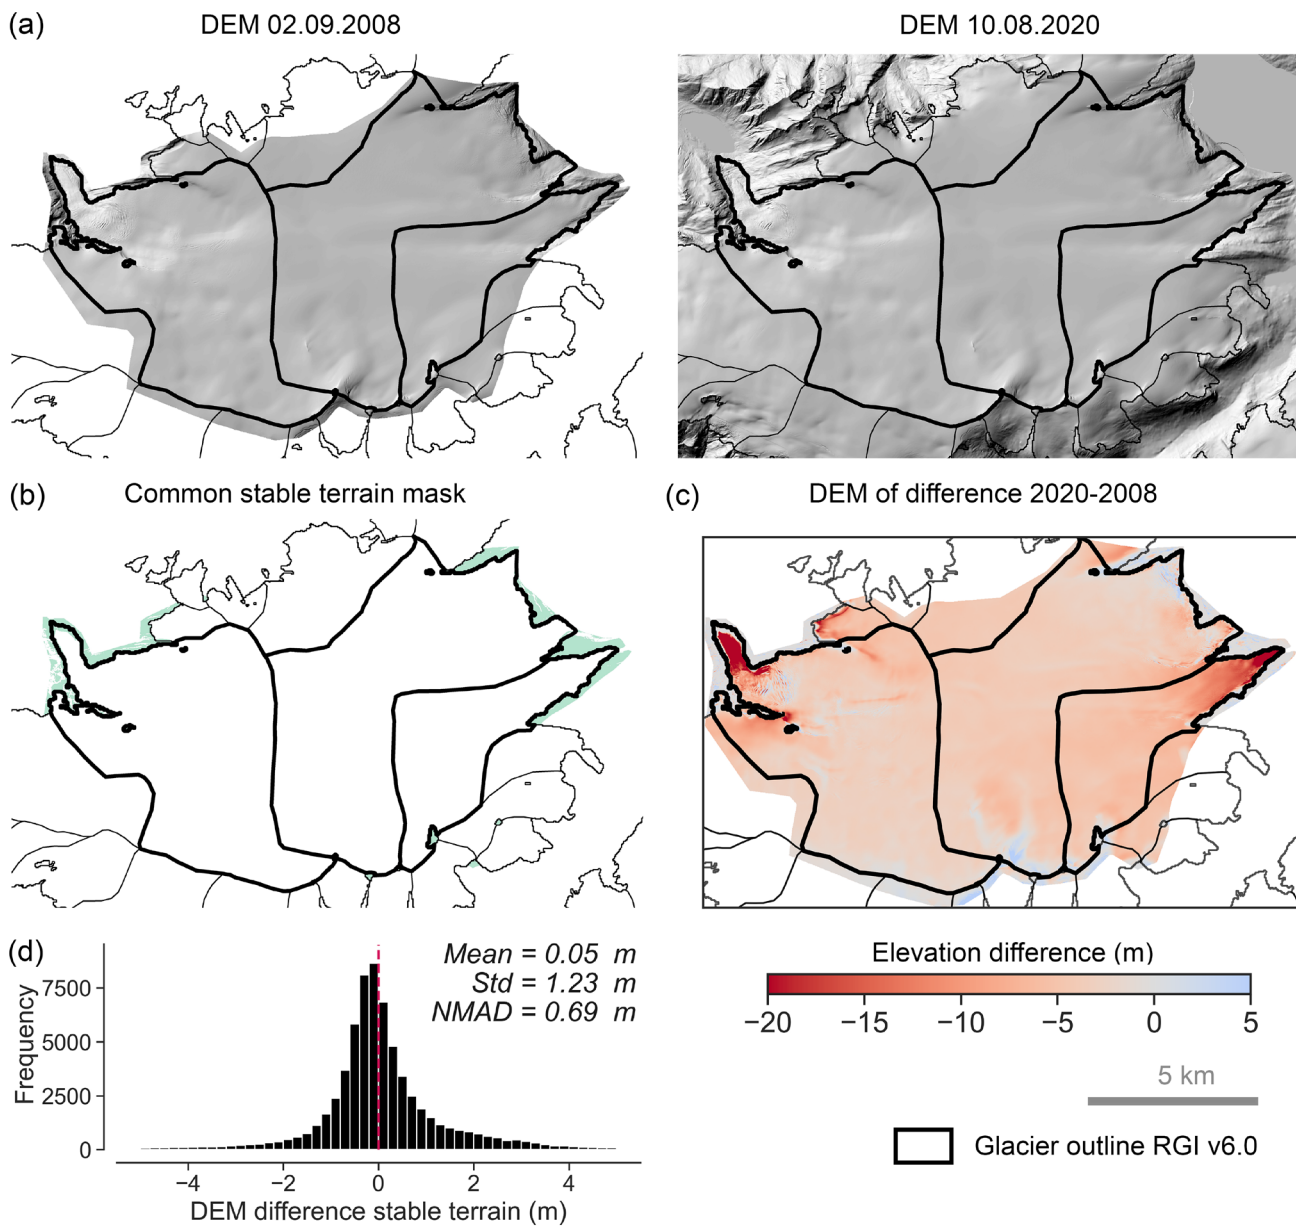

**Figure S5: Airborne lidar validation DEM for Vestisen. a) Hillshaded DEMs from 2 September 2010 and 10 August 2020. b) The stable terrain mask common to both DEMs used for co-registration and uncertainty assessment. c) Elevation change in metres between the 2020 and 2008 DEMs and d) the distribution of elevation differences on stable terrain with the main statistics.**

## Supplement Tables

**Table S1. Hintereis airborne validation data**

| GLACIER NAME            | Hintereisferner – Airborne validation data                                                                                                                                                                                                                                                                                                                                                                                                                                                                                                                                                                                                                                                                                       |                                                                                                                                                                                                                                                                                                                  |
|-------------------------|----------------------------------------------------------------------------------------------------------------------------------------------------------------------------------------------------------------------------------------------------------------------------------------------------------------------------------------------------------------------------------------------------------------------------------------------------------------------------------------------------------------------------------------------------------------------------------------------------------------------------------------------------------------------------------------------------------------------------------|------------------------------------------------------------------------------------------------------------------------------------------------------------------------------------------------------------------------------------------------------------------------------------------------------------------|
| ACQUISITION DATE        | 8 October 2010                                                                                                                                                                                                                                                                                                                                                                                                                                                                                                                                                                                                                                                                                                                   | 21 September 2019                                                                                                                                                                                                                                                                                                |
| DATA PROVIDER           | Christoph Klug and Rainer Prinz<br>University of Innsbruck (AT)<br>(Bollmann et al., 2015):                                                                                                                                                                                                                                                                                                                                                                                                                                                                                                                                                                                                                                      | Florian Siegert, 3D RealityMaps GmbH, München (DE)<br><a href="https://www.realitymaps.de">https://www.realitymaps.de</a><br>The DEM was created by 3D RealityMaps as a part of the AlpSenseBench Project (2018–2019) and funded by the Bavarian Ministry of Economic Affairs, Regional Development, and Energy. |
| DEM SOURCE / RESOLUTION | Airborne Lidar, resolution 1 m<br>WGS84 UTM32N, geoid height                                                                                                                                                                                                                                                                                                                                                                                                                                                                                                                                                                                                                                                                     | Airborne digital photogrammetry, resolution 0.2 m<br>WGS84 UTM32N, geoid height                                                                                                                                                                                                                                  |
| PROCESSING (dh)         | <ul style="list-style-type: none"> <li>• DEM 2019 (reference) resampled to 1 m using bilinear interpolation</li> <li>• Define stable terrain mask for co-registration (Fig. S1b) i.e., the off-glacier area defined by the RGI v6.0, excluding pixels with a difference in elevation (before co-registration) between 2019 and 2010 greater than <math>\pm 5</math> m.</li> <li>• DEM 2010 co-register with DEM 2019.</li> <li>• Elevation difference 2019–2010 DEMs (Fig. S1c).</li> <li>• Noise filtering of stable terrain (off-glacier area) before error assessment. The remaining bias after co-registration is not corrected (mean = -0.15 m, Fig S1d).</li> <li>• Uncertainty estimation on off-glacier area.</li> </ul> |                                                                                                                                                                                                                                                                                                                  |
| COREGISTRATION          | OpalsLSM (Pfeifer et al., 2014), least squares matching approach, rigid transformation<br><a href="https://opals.geo.tuwien.ac.at/html/stable/ModuleLSM.html">https://opals.geo.tuwien.ac.at/html/stable/ModuleLSM.html</a>                                                                                                                                                                                                                                                                                                                                                                                                                                                                                                      |                                                                                                                                                                                                                                                                                                                  |
| FILTERING               | Filtering only over off-glacier areas for uncertainty assessment due to morphological changes in the periglacial area. Removing pixels with elevation differences between 2019 and 2010 greater than $\pm 5$ m (after co-registration).                                                                                                                                                                                                                                                                                                                                                                                                                                                                                          |                                                                                                                                                                                                                                                                                                                  |
| VOID-FILLING            | No voids in the original DEMs. Off-glacier voids generated after filtering were not filled                                                                                                                                                                                                                                                                                                                                                                                                                                                                                                                                                                                                                                       |                                                                                                                                                                                                                                                                                                                  |
| RADAR PENETRATION       | Not applicable                                                                                                                                                                                                                                                                                                                                                                                                                                                                                                                                                                                                                                                                                                                   |                                                                                                                                                                                                                                                                                                                  |
| UNCERTAINTY             | Uncertainty of dh at a 95% confidence interval is $\pm 0.255$ m. The details of the error calculations, based on (Pfeifer et al., 2014), are available here:<br><a href="https://github.com/FannyBrun/uncert_RAGMAC_validation/blob/main/uncert_AT_Hintereis_from_Hugonnet_2022.ipynb">https://github.com/FannyBrun/uncert_RAGMAC_validation/blob/main/uncert_AT_Hintereis_from_Hugonnet_2022.ipynb</a>                                                                                                                                                                                                                                                                                                                          |                                                                                                                                                                                                                                                                                                                  |
| NOTE                    | The 2010 DEM has a smaller coverage than the RGI v6.0 (7,858 km <sup>2</sup> vs 8,036 km <sup>2</sup> respectively). Therefore, the DEMdiff 2019–2010 does not cover the RGI outline (Fig. S1a). However, the Lidar DEM 2010 observes the entire glacier, including the glacier tongue, as visible in the hillshade DEM. Since the participants worked with RGI06, we compared their DEM of differences using RGI06 and the lidar 2010 extension, and the estimated differences are in the order of centimetres. This is because the proglacial area is subject to erosion.                                                                                                                                                      |                                                                                                                                                                                                                                                                                                                  |

**Table S2. Aletsch airborne validation data**

| GROUP NAME              | Grosser Aletschgletscher - Airborne validation data                                                                                              |                                                                             |
|-------------------------|--------------------------------------------------------------------------------------------------------------------------------------------------|-----------------------------------------------------------------------------|
| ACQUISITION DATES       | Tile 1 - 13 Sep 2011 and tile 2 - 11 Aug 2011.<br>The coverage of the two DEMs is shown in Figure S2a.<br>Note that the tile partially overlaps. | 21 Sep 2017, 29 Aug 2017, and 8 Sep 2017, as illustrated in Figure S2b.     |
| DATA PROVIDER           | Christian Ginzler, WSL, Switzerland                                                                                                              | Freely available from Swisstopo                                             |
| DEM SOURCE / RESOLUTION | Airborne digital photogrammetry, 1 m resolution<br>CH03 LV03 (EPSG 21781).                                                                       | Airborne digital photogrammetry, 2 m resolution<br>CH1903+LV95 (EPSG 2056). |

|                            |                                                                                                                                                                                                                                                                                                                                                                                                                                                                                                                                                                                                                                                                                                                                                                                                                                                                                                                                                                                                                                                                                                                                                                                                                                                                                                                                                                                                                                                                                                                                                                                                                                                                                                                                                                                                                                                                       |                                                                                                                                                                             |
|----------------------------|-----------------------------------------------------------------------------------------------------------------------------------------------------------------------------------------------------------------------------------------------------------------------------------------------------------------------------------------------------------------------------------------------------------------------------------------------------------------------------------------------------------------------------------------------------------------------------------------------------------------------------------------------------------------------------------------------------------------------------------------------------------------------------------------------------------------------------------------------------------------------------------------------------------------------------------------------------------------------------------------------------------------------------------------------------------------------------------------------------------------------------------------------------------------------------------------------------------------------------------------------------------------------------------------------------------------------------------------------------------------------------------------------------------------------------------------------------------------------------------------------------------------------------------------------------------------------------------------------------------------------------------------------------------------------------------------------------------------------------------------------------------------------------------------------------------------------------------------------------------------------|-----------------------------------------------------------------------------------------------------------------------------------------------------------------------------|
| PRE-PROCESSING SINGLE DEMs | <ul style="list-style-type: none"> <li>DEM tile integration:             <ol style="list-style-type: none"> <li>We calculated the elevation difference of the glacier between 2011 August and 2011 September on their overlapping area (Fig. S2c, left).</li> <li>After excluding the presence of an elevation-dependent trend in their elevation difference, we corrected the 2011 August DEM by subtracting the median elevation difference, which was 1.45 m. The elevation difference between August 2011 and September 2011 on their overlapping area after correction is shown in Figure S14c right).</li> <li>The two DEMs (i.e. 2011 September and 2011 August) after elevation correction) were then mosaicked.</li> </ol> </li> <li>The mosaic DEM (coordinate system CH03 LV03 (epsg 21781) was projected to CH1903+LV95 (epsg 2056).</li> <li>The 1 m resolution was resampled to a 2 m resolution (bilinear interpolation method) to match the 2017 DEM resolution (Fig. S3a).</li> </ul>                                                                                                                                                                                                                                                                                                                                                                                                                                                                                                                                                                                                                                                                                                                                                                                                                                                                | The DEM 2017 (Fig. S3a) was provided by Swisstopo, and no information is available regarding the methods used to combine data from different dates. See section NOTE below. |
| PROCESSING (dh)            | <ul style="list-style-type: none"> <li>Elevation difference 2017–2011 DEMs (Fig. S4b)</li> <li>Define stable terrain mask for uncertainty estimation (Fig. S4a) i.e., the off-glacier area defined by the RGI v6.0, excluding pixels with a difference in elevation between 2017 and 2011 greater than <math>\pm 5</math> m.</li> <li>Uncertainty estimation on off-glacier area based on RGI6.0</li> </ul>                                                                                                                                                                                                                                                                                                                                                                                                                                                                                                                                                                                                                                                                                                                                                                                                                                                                                                                                                                                                                                                                                                                                                                                                                                                                                                                                                                                                                                                           |                                                                                                                                                                             |
| COREGISTRATION             | No co-registration was carried out between the two DEMs based on the distribution of elevation differences on stable terrain (Fig. S4c).                                                                                                                                                                                                                                                                                                                                                                                                                                                                                                                                                                                                                                                                                                                                                                                                                                                                                                                                                                                                                                                                                                                                                                                                                                                                                                                                                                                                                                                                                                                                                                                                                                                                                                                              |                                                                                                                                                                             |
| FILTERING                  | —                                                                                                                                                                                                                                                                                                                                                                                                                                                                                                                                                                                                                                                                                                                                                                                                                                                                                                                                                                                                                                                                                                                                                                                                                                                                                                                                                                                                                                                                                                                                                                                                                                                                                                                                                                                                                                                                     |                                                                                                                                                                             |
| VOID-FILLING               | No void filling was applied.                                                                                                                                                                                                                                                                                                                                                                                                                                                                                                                                                                                                                                                                                                                                                                                                                                                                                                                                                                                                                                                                                                                                                                                                                                                                                                                                                                                                                                                                                                                                                                                                                                                                                                                                                                                                                                          |                                                                                                                                                                             |
| RADAR PENETRATION          | Not applicable                                                                                                                                                                                                                                                                                                                                                                                                                                                                                                                                                                                                                                                                                                                                                                                                                                                                                                                                                                                                                                                                                                                                                                                                                                                                                                                                                                                                                                                                                                                                                                                                                                                                                                                                                                                                                                                        |                                                                                                                                                                             |
| UNCERTAINTY                | Uncertainty of dh at a 95% confidence interval is $\pm 0.921$ m. The details of the error calculations, based on Hugonnet et al. (2022), are available here: <a href="https://github.com/FannyBrun/uncert_RAGMAC_validation/blob/main/uncert_CH_ALE_from_Hugonnet2022.ipynb">https://github.com/FannyBrun/uncert_RAGMAC_validation/blob/main/uncert_CH_ALE_from_Hugonnet2022.ipynb</a>                                                                                                                                                                                                                                                                                                                                                                                                                                                                                                                                                                                                                                                                                                                                                                                                                                                                                                                                                                                                                                                                                                                                                                                                                                                                                                                                                                                                                                                                                |                                                                                                                                                                             |
| NOTE                       | Multiple flight campaigns were conducted in 2011 and 2017 to cover the entire glacier. In 2011, images were acquired in August and September, resulting in two separate DEMs. The differences in the overlapping area between these DEMs allowed for corrections and then mosaic. The 2017 DEM is a composite of aerial surveys conducted on various dates in both the accumulation and ablation zones (details in the linked source and Fig. S2b). Unlike the 2011 DEMs, no separate DEMs were available for 2017. Nevertheless, the longitudinal profile of both the 2011 and 2017 DEMs does not exhibit any visible jumps corresponding to the different survey dates (Fig. S3b).<br><a href="https://map.geo.admin.ch/index.html?topic=swisstopo&amp;layers=ch.swisstopo.lubis-luftbilder_schwarzweiss.ch.swisstopo.lubis-luftbilder_farbe.ch.swisstopo.lubis-bildstreifen.ch.swisstopo.images-swissimage-dop10.metadata.ch.swisstopo.swissimage-product.metadata.ch.swisstopo.lubis-luftbilder_infrarot&amp;lang=de&amp;bgLayer=ch.swisstopo.swissimage&amp;layers_timestamp=99991231.99991231...2017.99991231&amp;E=2653281.42&amp;N=1142655.05&amp;zoom=4&amp;layers_visibility=false,false,true,false,false,false&amp;layers_opacity=1,1,1,1,0.7,1&amp;catalogNodes=1430">https://map.geo.admin.ch/index.html?topic=swisstopo&amp;layers=ch.swisstopo.lubis-luftbilder_schwarzweiss.ch.swisstopo.lubis-luftbilder_farbe.ch.swisstopo.lubis-bildstreifen.ch.swisstopo.images-swissimage-dop10.metadata.ch.swisstopo.swissimage-product.metadata.ch.swisstopo.lubis-luftbilder_infrarot&amp;lang=de&amp;bgLayer=ch.swisstopo.swissimage&amp;layers_timestamp=99991231.99991231...2017.99991231&amp;E=2653281.42&amp;N=1142655.05&amp;zoom=4&amp;layers_visibility=false,false,true,false,false,false&amp;layers_opacity=1,1,1,1,0.7,1&amp;catalogNodes=1430</a> |                                                                                                                                                                             |

**Table S3. Vestisen airborne validation data**

|                  |                                                                                                                                                                                                                                                                            |             |
|------------------|----------------------------------------------------------------------------------------------------------------------------------------------------------------------------------------------------------------------------------------------------------------------------|-------------|
| GROUP NAME       | <b>Vestisen Icecap – Airborne validation data</b>                                                                                                                                                                                                                          |             |
| ACQUISITION DATE | 2 Sep 2008                                                                                                                                                                                                                                                                 | 10 Aug 2020 |
| DATA PROVIDER    | Liss M. Andreassen and Hallgeir Elvehøy, Norwegian Water Resources and Energy Directorate (NVE), Oslo (NO)/Engabreen and Storglombreen 3pkt 2008, /NDH Svartisen 2pkt 2020, Norwegian Mapping Authority (NO) ( <a href="https://hoydedata.no/">https://hoydedata.no/</a> ) |             |



|                         |                                                                                                                                                                                                                                                                                                                                                                                                                                                                                                                                                                                                                                                              |
|-------------------------|--------------------------------------------------------------------------------------------------------------------------------------------------------------------------------------------------------------------------------------------------------------------------------------------------------------------------------------------------------------------------------------------------------------------------------------------------------------------------------------------------------------------------------------------------------------------------------------------------------------------------------------------------------------|
| DEM SOURCE / RESOLUTION | Airborne Lidar, resolution 10 m, WGS84 UTM33N ellipsoid height. DEM generated in GIS, las to raster conversion.                                                                                                                                                                                                                                                                                                                                                                                                                                                                                                                                              |
| PROCESSING (dh)         | <ul style="list-style-type: none"> <li>Define stable terrain mask for co-registration (Fig. S5b) i.e., the off-glacier area defined by the RGI v6.0, including the manually digitised off-glacier area around the glacier tongue. Interpolated areas within the off-glacier mask are excluded.</li> <li>DEM 2008 co-register with DEM 2020 (larger extension).</li> <li>Elevation difference 2020–2008 (Fig. S5c).</li> <li>Noise filtering of stable terrain (off-glacier area) before error assessment. The remaining bias after co-registration is not corrected (mean = 0.05 m, Fig S5d).</li> <li>Uncertainty estimation on off-glacier area</li> </ul> |
| COREGISTRATION          | OpalsLSM (Pfeifer et al., 2014), least squares matching approach, rigid transformation. <a href="https://opals.geo.tuwien.ac.at/html/stable/ModuleLSM.html">https://opals.geo.tuwien.ac.at/html/stable/ModuleLSM.html</a>                                                                                                                                                                                                                                                                                                                                                                                                                                    |
| FILTERING               | —                                                                                                                                                                                                                                                                                                                                                                                                                                                                                                                                                                                                                                                            |
| VOID-FILLING            | No voids in the original DEMs. Off-glacier voids generated after filtering were not filled.                                                                                                                                                                                                                                                                                                                                                                                                                                                                                                                                                                  |
| RADAR PENETRATION       | Not applicable                                                                                                                                                                                                                                                                                                                                                                                                                                                                                                                                                                                                                                               |
| UNCERTAINTY             | Uncertainty of dh at a 95% confidence interval is $\pm 0.18$ m for the entire ice cap. The uncertainty of the three individual glaciers is $\pm 0.196$ m. The details of the error calculations, based on Hugonnet et al. (2022), are available here: <a href="https://github.com/FannyBrun/uncert_RAGMAC_validation/blob/main/uncert_NO_Vestisen_from_Hugonnet2022.ipynb">https://github.com/FannyBrun/uncert_RAGMAC_validation/blob/main/uncert_NO_Vestisen_from_Hugonnet2022.ipynb</a>                                                                                                                                                                    |
| NOTE                    | Limited stable terrain degrades the robustness of co-registration and uncertainty assessment.                                                                                                                                                                                                                                                                                                                                                                                                                                                                                                                                                                |

**Table S4. BAW spaceborne results.**

|                          |                                                                                                                                                                                                                                                                                                                                              |
|--------------------------|----------------------------------------------------------------------------------------------------------------------------------------------------------------------------------------------------------------------------------------------------------------------------------------------------------------------------------------------|
| GROUP                    | <b>BAW</b> – Bavarian Academy of Sciences and Humanities                                                                                                                                                                                                                                                                                     |
| AUTHORS and AFFILIATIONS | <b>Anja Wendt<sup>1</sup></b><br><sup>1</sup> Bavarian Academy of Sciences and Humanities, Munich, Germany                                                                                                                                                                                                                                   |
| GLACIER                  | <b>Hintereisferner, Grosser Aletschgletscher</b>                                                                                                                                                                                                                                                                                             |
| GROUP-#                  | BAW-1                                                                                                                                                                                                                                                                                                                                        |
| QUALITY FLAG             | —                                                                                                                                                                                                                                                                                                                                            |
| SOURCE                   | TanDEM-X                                                                                                                                                                                                                                                                                                                                     |
| DEM                      | Provided DEMs                                                                                                                                                                                                                                                                                                                                |
| PROCESSING (dh)          | Differencing of DEM pairs of the same season                                                                                                                                                                                                                                                                                                 |
| REFERENCE DEM            | Copernicus DEM                                                                                                                                                                                                                                                                                                                               |
| COREGISTRATION           | Horizontal shift correction on stable terrain outside RGI polygons according to Nuth and Kääb (2011)                                                                                                                                                                                                                                         |
| BIAS                     | Tilt correction by a 1-degree polynomial + correction of median dh                                                                                                                                                                                                                                                                           |
| FILTERING                | Outlier filtering for dh > 50 m (70 m for Aletsch)                                                                                                                                                                                                                                                                                           |
| VOID-FILLING             | Hypsometric gap filling in 20 m bins for each glacier individually                                                                                                                                                                                                                                                                           |
| RADAR PENETRATION        | None, assuming comparable conditions in both DEMs, but included in uncertainty analysis                                                                                                                                                                                                                                                      |
| TEMPORAL                 | dh/dt (and uncertainty) scaled to the validation period using the number of days.                                                                                                                                                                                                                                                            |
| UNCERTAINTY (dh_sigma)   | Error components quadratically added: <ul style="list-style-type: none"> <li>Measurement error: NMAD (Höhle and Höhle, 2009) on bedrock, considering spatial autocorrelation (Rolstad et al., 2009)</li> <li>50% extrapolation error for gaps</li> <li>Penetration depth error of 1 m in accumulation area in winter acquisitions</li> </ul> |

**Table S5. DLR spaceborne results.**

|                          |                                                                                                                                                                                                                                                                                                                                                                                                                                                                                                                                                                                                                                                                                                 |                 |                                             |                                                                  |                 |               |                                                       |
|--------------------------|-------------------------------------------------------------------------------------------------------------------------------------------------------------------------------------------------------------------------------------------------------------------------------------------------------------------------------------------------------------------------------------------------------------------------------------------------------------------------------------------------------------------------------------------------------------------------------------------------------------------------------------------------------------------------------------------------|-----------------|---------------------------------------------|------------------------------------------------------------------|-----------------|---------------|-------------------------------------------------------|
| GROUP                    | <b>DLR – German Aerospace Center</b>                                                                                                                                                                                                                                                                                                                                                                                                                                                                                                                                                                                                                                                            |                 |                                             |                                                                  |                 |               |                                                       |
| AUTHORs and AFFILIATIONs | <b>Lukas Krieger<sup>1</sup>, Dana Floricioiu<sup>1</sup></b><br><sup>1</sup> Remote Sensing Technology Institute, German Aerospace Center, Oberpfaffenhofen, Germany                                                                                                                                                                                                                                                                                                                                                                                                                                                                                                                           |                 |                                             |                                                                  |                 |               |                                                       |
| GLACIER                  | <b>Hintereisferner</b>                                                                                                                                                                                                                                                                                                                                                                                                                                                                                                                                                                                                                                                                          |                 |                                             |                                                                  |                 |               |                                                       |
| GROUP-#                  | DLR-1                                                                                                                                                                                                                                                                                                                                                                                                                                                                                                                                                                                                                                                                                           | DLR-2           | DLR-3                                       | DLR-4                                                            | DLR-5           | DLR-6         | DLR-7                                                 |
| QUALITY FLAG             | Low confidence: combined ascending and descending pass direction                                                                                                                                                                                                                                                                                                                                                                                                                                                                                                                                                                                                                                | —               | —                                           | Low confidence: combined ascending and descending pass direction | —               | —             | —                                                     |
| SOURCE                   | TanDEM-X                                                                                                                                                                                                                                                                                                                                                                                                                                                                                                                                                                                                                                                                                        |                 |                                             |                                                                  |                 |               |                                                       |
| DEM                      | Processed TanDEM-X DEMs with ITP (Fritz et al., 2011)                                                                                                                                                                                                                                                                                                                                                                                                                                                                                                                                                                                                                                           |                 |                                             |                                                                  |                 | Provided DEMs | Processed TanDEM-X DEMs with ITP (Fritz et al., 2011) |
|                          | 2011-09-24                                                                                                                                                                                                                                                                                                                                                                                                                                                                                                                                                                                                                                                                                      | 2011-09-24      |                                             | 2011-09-24                                                       | 2011-09-24      |               |                                                       |
|                          | —<br>2020-09-11                                                                                                                                                                                                                                                                                                                                                                                                                                                                                                                                                                                                                                                                                 | —<br>2019-02-09 |                                             | —<br>2020-09-11                                                  | —<br>2019-02-09 |               |                                                       |
| PROCESSING (dh)          | DEM difference                                                                                                                                                                                                                                                                                                                                                                                                                                                                                                                                                                                                                                                                                  |                 |                                             |                                                                  |                 |               |                                                       |
| REFERENCE DEM            | Copernicus DEM                                                                                                                                                                                                                                                                                                                                                                                                                                                                                                                                                                                                                                                                                  |                 | Edited TanDEM-X DEM (González et al., 2020) | Copernicus DEM                                                   |                 |               | Edited TanDEM-X DEM (González et al., 2020)           |
| COREGISTRATION           | Co-registration is performed during DEM processing (Schweisshelm et al., 2021)                                                                                                                                                                                                                                                                                                                                                                                                                                                                                                                                                                                                                  |                 |                                             | Nuth and Kääb (2011) on stable terrain defined as off-RGI area   |                 |               |                                                       |
| BIAS                     | Median correction to manually selected flat ice-free areas                                                                                                                                                                                                                                                                                                                                                                                                                                                                                                                                                                                                                                      |                 |                                             |                                                                  |                 |               |                                                       |
| FILTERING                | 1. Absolute elevating changes > +20.0 m are discarded<br>2. Absolute elevating changes < -100.0 m are discarded<br>3. For each pixel, a window size of 11x11 pixels is used to calculate the statistics of the surrounding pixels. A pixel is masked if the following condition is met<br>$abs(center\_pix - median(neighbourhood)) \geq 2.0 * std(neighbourhood)$                                                                                                                                                                                                                                                                                                                              |                 |                                             |                                                                  |                 |               |                                                       |
| VOID-FILLING             | Hypsometry of DEMdiff (median, elevation bin 50 m)                                                                                                                                                                                                                                                                                                                                                                                                                                                                                                                                                                                                                                              |                 |                                             |                                                                  |                 |               |                                                       |
| RADAR PENETRATION        | —                                                                                                                                                                                                                                                                                                                                                                                                                                                                                                                                                                                                                                                                                               |                 |                                             |                                                                  |                 |               |                                                       |
| TEMPORAL                 | Linear trend fit to validation period                                                                                                                                                                                                                                                                                                                                                                                                                                                                                                                                                                                                                                                           |                 |                                             |                                                                  |                 |               |                                                       |
| UNCERTAINTY (dh_sigma)   | <ul style="list-style-type: none"> <li>Co-registration uncertainty calculated as in Abdel et al. (2019)</li> <li>Gap filling errors are accounted for if less than 1000 values are found within one elevation band and the search area is expanded to neighbouring glaciers. Then the uncertainty per pixel is set to <math>\sigma = MAD(x) * 1.48</math></li> <li>Uncertainties because of area, seasonal correction and signal penetration have not been considered</li> <li>Overall error: the error components are added independently <math>\sigma_{overall} = \sqrt{\sigma_{coreg}^2 + \sigma_{void}^2}</math></li> <li>All errors are reported at the 95% confidence interval</li> </ul> |                 |                                             |                                                                  |                 |               |                                                       |

|                          |                                                                                                                                                                                                                                                                                                                                                                                                                                                                                                                                                                                                                                                                                                       |                                             |                                                                    |                                             |                |       |
|--------------------------|-------------------------------------------------------------------------------------------------------------------------------------------------------------------------------------------------------------------------------------------------------------------------------------------------------------------------------------------------------------------------------------------------------------------------------------------------------------------------------------------------------------------------------------------------------------------------------------------------------------------------------------------------------------------------------------------------------|---------------------------------------------|--------------------------------------------------------------------|---------------------------------------------|----------------|-------|
| GROUP                    | <b>DLR – German Aerospace Center</b>                                                                                                                                                                                                                                                                                                                                                                                                                                                                                                                                                                                                                                                                  |                                             |                                                                    |                                             |                |       |
| AUTHORs and AFFILIATIONs | <b>Lukas Krieger<sup>1</sup>, Dana Floricioiu<sup>1</sup></b><br><sup>1</sup> Remote Sensing Technology Institute, German Aerospace Center, Oberpfaffenhofen, Germany                                                                                                                                                                                                                                                                                                                                                                                                                                                                                                                                 |                                             |                                                                    |                                             |                |       |
| GLACIER                  | <b>Grosser Aletschgletscher (ALE)</b>                                                                                                                                                                                                                                                                                                                                                                                                                                                                                                                                                                                                                                                                 |                                             |                                                                    |                                             |                |       |
| GROUP-#                  | DLR-1                                                                                                                                                                                                                                                                                                                                                                                                                                                                                                                                                                                                                                                                                                 | DLR-2                                       | DLR-3                                                              | DLR-4                                       | DLR-5          | DLR-6 |
| QUALITY FLAG             | Low confidence: Results expected to be affected by radar penetration due to mixed use of winter and summer DEMs                                                                                                                                                                                                                                                                                                                                                                                                                                                                                                                                                                                       |                                             |                                                                    |                                             |                | —     |
| SOURCE                   | TanDEM-X                                                                                                                                                                                                                                                                                                                                                                                                                                                                                                                                                                                                                                                                                              |                                             |                                                                    |                                             |                |       |
| DEM                      | Processed TanDEM-X DEMs with ITP (Fritz et al., 2011)                                                                                                                                                                                                                                                                                                                                                                                                                                                                                                                                                                                                                                                 |                                             |                                                                    | Provided DEMs                               |                |       |
|                          | 2011-09-23<br>2011-08-21<br>—<br>2018-01-03                                                                                                                                                                                                                                                                                                                                                                                                                                                                                                                                                                                                                                                           |                                             |                                                                    | 2013-03-21<br>—<br>2019-01-01               |                |       |
| PROCESSING (dh)          | DEM difference                                                                                                                                                                                                                                                                                                                                                                                                                                                                                                                                                                                                                                                                                        |                                             |                                                                    |                                             |                |       |
| REFERENCE DEM            | Copernicus DEM                                                                                                                                                                                                                                                                                                                                                                                                                                                                                                                                                                                                                                                                                        | Edited TanDEM-X DEM (González et al., 2020) | Copernicus DEM                                                     | Edited TanDEM-X DEM (González et al., 2020) | Copernicus DEM |       |
| COREGISTRATION           | Co-registration is performed during DEM processing (Schweissshelm et al., 2021)                                                                                                                                                                                                                                                                                                                                                                                                                                                                                                                                                                                                                       |                                             | Nuth and Kääb (2011) on stable terrain defined as the off-RGI area |                                             |                |       |
| BIAS                     | Median correction to manually selected flat ice-free areas                                                                                                                                                                                                                                                                                                                                                                                                                                                                                                                                                                                                                                            |                                             |                                                                    |                                             |                |       |
| FILTERING                | <ul style="list-style-type: none"> <li>• Absolute elevating changes &gt; +20.0 m are discarded</li> <li>• Absolute elevating changes &lt; -100.0 m are discarded</li> <li>• For each pixel, a window with a size of 11x11 pixels is used to calculate the statistics of the surrounding pixels. A pixel is masked if the following condition is met</li> <li>• <math>abs(center\_pix - median(neighbourhood)) \geq 2.0 * std(neighbourhood)</math></li> </ul>                                                                                                                                                                                                                                         |                                             |                                                                    |                                             |                |       |
| VOID-FILLING             | Hypsometry of DEMdiff (median, elevation bin 50 m)                                                                                                                                                                                                                                                                                                                                                                                                                                                                                                                                                                                                                                                    |                                             |                                                                    |                                             |                |       |
| RADAR PENETRATION        | —                                                                                                                                                                                                                                                                                                                                                                                                                                                                                                                                                                                                                                                                                                     |                                             |                                                                    |                                             |                |       |
| TEMPORAL                 | Linear trend fit to validation period                                                                                                                                                                                                                                                                                                                                                                                                                                                                                                                                                                                                                                                                 |                                             |                                                                    |                                             |                |       |
| UNCERTAINTY (dh_sigma)   | <p>Co-registration uncertainty calculated as in Abdel et al. (2019)</p> <ul style="list-style-type: none"> <li>• Gap filling errors are accounted for if less than 1000 values are found within one elevation band and the search area is expanded to neighbouring glaciers. Then the uncertainty per pixel is set to <math>\sigma = MAD(x) * 1.48</math></li> <li>• Uncertainties because of area, seasonal correction and signal penetration have not been considered</li> <li>• Overall error: The error components are added independently <math>\sigma_{overall} = \sqrt{\sigma_{coreg}^2 + \sigma_{void}^2}</math></li> <li>• All errors are reported at the 95% confidence interval</li> </ul> |                                             |                                                                    |                                             |                |       |

**Table S6. ETH spaceborne results.**

|                          |                                                                                                                                                                                                                                                                                                                                                                                                                                                                                            |
|--------------------------|--------------------------------------------------------------------------------------------------------------------------------------------------------------------------------------------------------------------------------------------------------------------------------------------------------------------------------------------------------------------------------------------------------------------------------------------------------------------------------------------|
| GROUP                    | <b>ETH – Eidgenössische Technische Hochschule Zürich</b>                                                                                                                                                                                                                                                                                                                                                                                                                                   |
| AUTHORs and AFFILIATIONs | <b>Romain Hugonnet</b> <sup>1,2,3</sup><br><sup>1</sup> Laboratory of Hydraulics, Hydrology and Glaciology (VAW), ETH Zürich, Zürich, Switzerland<br><sup>2</sup> Swiss Federal Institute for Forest, Snow and Landscape Research (WSL), Birmensdorf, Switzerland<br><sup>3</sup> University of Washington, Civil and Environmental Engineering, Seattle, WA, USA                                                                                                                          |
| GLACIER                  | <b>Hintereisferner, Grosser Aletschgletscher, Vestisen, Baltoro, Northern Patagonian Icefield</b>                                                                                                                                                                                                                                                                                                                                                                                          |
| GROUP-#                  | ETH-1                                                                                                                                                                                                                                                                                                                                                                                                                                                                                      |
| QUALITY FLAG             | —                                                                                                                                                                                                                                                                                                                                                                                                                                                                                          |
| SOURCE                   | ASTER                                                                                                                                                                                                                                                                                                                                                                                                                                                                                      |
| DEM                      | All daytime ASTER DEMs with less than 99% cloud coverage until 30 September 2019 generated with MMASTER routines (Girod et al., 2017) improved in Hugonnet et al. (2021) and ArcticDEM DEMs above 60°N.                                                                                                                                                                                                                                                                                    |
| PROCESSING (dh)          | What is described below in the following order: <ul style="list-style-type: none"> <li>• Co-registration</li> <li>• Bias correction</li> <li>• Re-co-registration</li> <li>• Filtering</li> <li>• Temporal</li> <li>• Gap-filling</li> </ul>                                                                                                                                                                                                                                               |
| REFERENCE DEM            | TanDEM-X global 90 m DEM                                                                                                                                                                                                                                                                                                                                                                                                                                                                   |
| COREGISTRATION           | Horizontal and vertical following Nuth and Kääb (2011)                                                                                                                                                                                                                                                                                                                                                                                                                                     |
| BIAS                     | Cross-track polynomial and along-track sum of sinusoids after 3 by 3 granule stitching, see Girod et al. (2017) and Hugonnet et al. (2021) Supplementary Section 1.                                                                                                                                                                                                                                                                                                                        |
| FILTERING                | Multi-step spatial and temporal filtering, including iterative temporal Gaussian Process regression, see Hugonnet et al. (2021) in supplementary equations S1 to S7.                                                                                                                                                                                                                                                                                                                       |
| VOID-FILLING             | A weighted version of the local hypsometric method of McNabb et al. (2019), see Hugonnet et al. (2021)                                                                                                                                                                                                                                                                                                                                                                                     |
| RADAR PENETRATION        | Not applicable                                                                                                                                                                                                                                                                                                                                                                                                                                                                             |
| TEMPORAL                 | Temporal Gaussian Process regression of all filtered elevation, see Hugonnet et al. (2021) Equations 1 and 2.                                                                                                                                                                                                                                                                                                                                                                              |
| UNCERTAINTY (dh_sigma)   | Two error sources: mean elevation change and area.<br>Main equation: see Hugonnet et al. (2021), Equation 3. <ul style="list-style-type: none"> <li>• Mean elevation uncertainty accounts for heteroscedasticity and spatial correlation of errors in DEMs: see Hugonnet et al. (2022), Equation 18 or Hugonnet et al. (2021), Equations 4–6.</li> <li>• Area uncertainty by multiplying the dh error to a buffer of 15 m: see Hugonnet et al. (2021), Methods.</li> </ul>                 |
| NOTE                     | Results are extracted from the closest start and end months in a monthly time series. While this partially mitigates seasonal biases, we show in Hugonnet et al. (2021) that small systematic seasonal elevation errors occur due to co-registration on snow-covered terrain (Fig. S5, Table S3). These systematic errors will affect the estimates provided here for different start and end months, while they do not affect the annual and decadal estimates of Hugonnet et al. (2021). |



**Table S7. FAU spaceborne results.**

|                          |                                                                                                                                                                                                                                       |                |                              |                |                       |                                                                                                |
|--------------------------|---------------------------------------------------------------------------------------------------------------------------------------------------------------------------------------------------------------------------------------|----------------|------------------------------|----------------|-----------------------|------------------------------------------------------------------------------------------------|
| GROUP                    | <b>FAU – Friedrich-Alexander-Universität Erlangen-Nürnberg</b>                                                                                                                                                                        |                |                              |                |                       |                                                                                                |
| AUTHORS and AFFILIATIONS | <b>Christian Sommer<sup>1</sup>, Thorsten Seehaus<sup>1</sup>, Philipp Malz<sup>1</sup>, Matthias Braun<sup>1</sup></b><br><sup>1</sup> Institut für Geographie, Friedrich-Alexander-Universität Erlangen-Nürnberg, Erlangen, Germany |                |                              |                |                       |                                                                                                |
| GLACIER                  | <b>Grosser Aletschgletscher (ALE)</b>                                                                                                                                                                                                 |                | <b>Hintereisferner (HEF)</b> |                | <b>Vestisen (VES)</b> |                                                                                                |
| GROUP-#                  | FAU-1                                                                                                                                                                                                                                 | FAU-2          | FAU-1                        | FAU-2          | FAU-1                 | FAU-2                                                                                          |
| QUALITY FLAG             | —                                                                                                                                                                                                                                     | —              | —                            | —              | —                     | Low confidence: Very low spatial coverage due to poor input DEM quality (voids due to clouds). |
| SOURCE                   | Provided DEMs                                                                                                                                                                                                                         |                |                              |                |                       |                                                                                                |
| DEM                      | TanDEM-X                                                                                                                                                                                                                              | ASTER          | TanDEM-X                     | ASTER          | TanDEM-X              | ASTER                                                                                          |
| PROCESSING (dh)          | DEM (mosaics) differencing                                                                                                                                                                                                            |                |                              |                |                       |                                                                                                |
| REFERENCE DEM            | SRTM                                                                                                                                                                                                                                  | Copernicus DEM | SRTM                         | Copernicus DEM | Copernicus DEM        |                                                                                                |
| COREGISTRATION           | Nuth and Kääb (2011) on stable terrain (outside RGI)                                                                                                                                                                                  |                |                              |                |                       |                                                                                                |
| BIAS                     | Iterative vertical deramping on stable terrain (outside RGI)                                                                                                                                                                          |                |                              |                |                       |                                                                                                |
| FILTERING                | Hypsometric 1–99% quantile filter (50 m elevation bins)                                                                                                                                                                               |                |                              |                |                       |                                                                                                |
| VOID-FILLING             | Global hypsometric gap filling (50 m elevation bins)                                                                                                                                                                                  |                |                              |                |                       |                                                                                                |
| RADAR PENETRATION        |                                                                                                                                                                                                                                       | Not applicable |                              | Not applicable |                       | Not applicable                                                                                 |
| TEMPORAL                 | —                                                                                                                                                                                                                                     |                |                              |                |                       |                                                                                                |
| UNCERTAINTY (dh_sigma)   | SD of stable terrain (outside RGI areas), aggregated in 5° slope bins, weighted by respective glacier area, integration of spatial autocorrelation (Rolstad et al. 2009).                                                             |                |                              |                |                       |                                                                                                |

|                          |                                                                                                                                                                                                                                       |               |               |               |                |       |
|--------------------------|---------------------------------------------------------------------------------------------------------------------------------------------------------------------------------------------------------------------------------------|---------------|---------------|---------------|----------------|-------|
| GROUP                    | <b>FAU – Friedrich-Alexander-Universität Erlangen-Nürnberg</b>                                                                                                                                                                        |               |               |               |                |       |
| AUTHORS and AFFILIATIONS | <b>Christian Sommer<sup>1</sup>, Thorsten Seehaus<sup>1</sup>, Philipp Malz<sup>1</sup>, Matthias Braun<sup>1</sup></b><br><sup>1</sup> Institut für Geographie, Friedrich-Alexander-Universität Erlangen-Nürnberg, Erlangen, Germany |               |               |               |                |       |
| GLACIER                  | <b>Baltoro (BAL)</b><br>2000–12 [FAU-1 – FAU-5]<br>2012–19 [FAU-6 – FAU-10]                                                                                                                                                           |               |               |               |                |       |
| GROUP-#                  | FAU-1 & FAU-6                                                                                                                                                                                                                         | FAU-2 & FAU-7 | FAU-3 & FAU-8 | FAU-4 & FAU-9 | FAU-5 & FAU-10 |       |
| QUALITY FLAG             | —                                                                                                                                                                                                                                     | —             | —             | —             | —              |       |
| SOURCE                   | Provided DEMs                                                                                                                                                                                                                         |               |               |               |                |       |
| DEM                      | TanDEM-X                                                                                                                                                                                                                              |               |               |               |                | ASTER |
| PROCESSING (dh)          | DEM (mosaics) differencing                                                                                                                                                                                                            |               |               |               |                |       |

|                        |                                                                                                                                                                           |   |                                                              |
|------------------------|---------------------------------------------------------------------------------------------------------------------------------------------------------------------------|---|--------------------------------------------------------------|
| REFERENCE DEM          | SRTM                                                                                                                                                                      |   | Copernicus DEM                                               |
| COREGISTRATION         | Nuth and Kääb (2011) on stable terrain (outside RGI)                                                                                                                      | — | Nuth and Kääb (2011) on stable terrain (outside RGI)         |
| BIAS                   | Iterative vertical deramping on stable terrain (outside RGI)                                                                                                              | — | Iterative vertical deramping on stable terrain (outside RGI) |
| FILTERING              | Hypsometric 1–99% quantile filter (50 m elevation bins)                                                                                                                   | — | Hypsometric 1–99% quantile filter (50 m elevation bins)      |
| VOID-FILLING           | Global hypsometric gap-filling (50m elevation bins)                                                                                                                       |   | Global hypsometric gap-filling (50m elevation bins)          |
| RADAR PENETRATION      | —                                                                                                                                                                         |   | Not applicable                                               |
| TEMPORAL               | —                                                                                                                                                                         |   |                                                              |
| UNCERTAINTY (dh_sigma) | SD of stable terrain (outside RGI areas), aggregated in 5° slope bins, weighted by respective glacier area, integration of spatial autocorrelation (Rolstad et al. 2009). |   |                                                              |

**Table S8. GAC spaceborne results.**

|                          |                                                                                                                                                                                                                                                                                                                                                                                 |
|--------------------------|---------------------------------------------------------------------------------------------------------------------------------------------------------------------------------------------------------------------------------------------------------------------------------------------------------------------------------------------------------------------------------|
| GROUP                    | <b>GAC – Gustavus Adolphus College</b>                                                                                                                                                                                                                                                                                                                                          |
| AUTHORS and AFFILIATIONS | <b>Laura Boehm Vock<sup>1</sup> and Jeff D La Freniere<sup>2</sup></b><br><sup>1</sup> Department of Mathematics, Statistics, and Computer Science, St. Olaf College, Northfield, Minnesota, USA<br><sup>2</sup> Department of Environment, Geography, and Earth Sciences, Gustavus Adolphus College, St. Peter, Minnesota, USA                                                 |
| GLACIER                  | <b>Baltoro (BAL)</b>                                                                                                                                                                                                                                                                                                                                                            |
| GROUP-#                  | GAC-1                                                                                                                                                                                                                                                                                                                                                                           |
| QUALITY FLAG             | —                                                                                                                                                                                                                                                                                                                                                                               |
| SOURCE                   | TanDEM-X                                                                                                                                                                                                                                                                                                                                                                        |
| DEM                      | Provided DEM time series                                                                                                                                                                                                                                                                                                                                                        |
| PROCESSING (dh)          | DEM difference                                                                                                                                                                                                                                                                                                                                                                  |
| REFERENCE DEM            | Copernicus DEM                                                                                                                                                                                                                                                                                                                                                                  |
| COREGISTRATION           | Co-register all TanDEM-X DEMs to Copernicus DEM as reference DEM following Nuth and Kääb (2011)                                                                                                                                                                                                                                                                                 |
| BIAS                     | Find median dh in 50m bins on stable terrain (off-glacier, slope < 40 degrees). Use a linear fit to estimate bias on elevation between 3400–5800 m. For elevation >5800 m, use bias at 5800 m, and for elevation <3400 m, use bias at 3400 m                                                                                                                                    |
| FILTERING                | Removed values exceeding $\pm 3$ NMAD from median elevation in 50 m bins. (areas <3400 m and >5400 m were treated as one bin each due to small values>)                                                                                                                                                                                                                         |
| VOID-FILLING             | Filled missing pixels with mean dh according to 50m elevation bins                                                                                                                                                                                                                                                                                                              |
| RADAR PENETRATION        | We applied an elevation-dependent C-Band penetration model to the SRTM data set based on results specific to East Karakoram by Kumar et al. (2019). We then applied an X-Band radar penetration model to the TanDEM-X tiles collected in the months of January and February based on C/X band penetration differences calculated for the Karakoram region by Lin et al. (2017). |

|             |                                                                                                                                                                                                                                                                                                                                                                                                                                                                                                                                                                                                                                                                                                                                                                                                                                                                                                                                                                                                                                                                                                                                                                                                                                                                                                                                                                                                                                                                                                                                                                                                                                                                                                                                                                                                                                                                                                                                                                                                                                                                                                                                                                                                                                                                                                                                                                                                                                                                                                                                                                            |
|-------------|----------------------------------------------------------------------------------------------------------------------------------------------------------------------------------------------------------------------------------------------------------------------------------------------------------------------------------------------------------------------------------------------------------------------------------------------------------------------------------------------------------------------------------------------------------------------------------------------------------------------------------------------------------------------------------------------------------------------------------------------------------------------------------------------------------------------------------------------------------------------------------------------------------------------------------------------------------------------------------------------------------------------------------------------------------------------------------------------------------------------------------------------------------------------------------------------------------------------------------------------------------------------------------------------------------------------------------------------------------------------------------------------------------------------------------------------------------------------------------------------------------------------------------------------------------------------------------------------------------------------------------------------------------------------------------------------------------------------------------------------------------------------------------------------------------------------------------------------------------------------------------------------------------------------------------------------------------------------------------------------------------------------------------------------------------------------------------------------------------------------------------------------------------------------------------------------------------------------------------------------------------------------------------------------------------------------------------------------------------------------------------------------------------------------------------------------------------------------------------------------------------------------------------------------------------------------------|
| TEMPORAL    | —                                                                                                                                                                                                                                                                                                                                                                                                                                                                                                                                                                                                                                                                                                                                                                                                                                                                                                                                                                                                                                                                                                                                                                                                                                                                                                                                                                                                                                                                                                                                                                                                                                                                                                                                                                                                                                                                                                                                                                                                                                                                                                                                                                                                                                                                                                                                                                                                                                                                                                                                                                          |
| UNCERTAINTY | <p>We estimate the standard deviation for the different error sources and add them together using propagation of error laws.</p> <p>We report uncertainty as a standard error by dividing it by the square root of the effective sample size (<math>N_{eff}</math>), accounting for spatial correlation, as in Rolstad et al. (2009). Our estimated spatial range parameters for the control results were 270–320 km.</p> <p>The uncertainties accounted for are:</p> <ul style="list-style-type: none"> <li>• Uncertainty in elevation change, <math>dh</math>, measured as standard deviation (denoted <math>\sigma_{dz}</math>)</li> <li>• Uncertainty due to filing procedure: We did filling based on elevation bins; therefore, we added the standard deviation of <math>dh</math> for each bin, weighting by the number of points that were filled in that bin. Then we divide by the total number of pixels so that the uncertainty is only accounted for on the fraction of the glacier that is filled. (denoted <math>\sigma_{fill}</math>)</li> <li>• Uncertainty of radar penetration adjustment: We assume an uncertainty of 1 m for C-band penetration and 4 m for X-band penetration, applied only to non-debris-covered portions of the glacier. (denoted <math>\sigma_{pen}</math>)</li> <li>• Uncertainty of seasonal adjustment; We used the conservative estimate that the standard deviation is equal to 100% of the magnitude of the adjustment made. (denoted <math>\sigma_{seas}</math>)</li> <li>• Uncertainty of glacier area: We assumed the standard deviation is half the observed difference between the area calculated using the provided extent (809 km<sup>2</sup>) and the area calculated from the TanDEM-X DEM (843 km<sup>2</sup>), or about 20 km<sup>2</sup>. (denoted <math>\sigma_S</math>, for surface area)</li> </ul> <p>The standard error of mean elevation change is<br/> <math display="block">\sigma_{dh} = \sqrt{(\sigma_{dz}^2 + \sigma_{fill}^2 + \sigma_{pen}^2 + \sigma_{seas}^2)/N_{eff}}</math></p> <p>The standard error of volume change is<br/> <math display="block">\sigma_{dV} = \sqrt{(\sigma_{dh}^2 * S^2 + dh^2 * \sigma_S^2 + \sigma_{dh}^2 * \sigma_S^2)}</math></p> <p>Where <math>S</math> is the surface area of the glacier. Note that the usual propagation of error equation for a product (<math>dh * S</math>) would omit the last term (<math>\sigma_{dh}^2 * \sigma_S^2</math>) under the assumption that this value is small; however, we chose to include it here as it is more exact.</p> |

**Table S9. LEG spaceborne results.**

|                          |                                                                                                                                                                                                                                                       |                       |
|--------------------------|-------------------------------------------------------------------------------------------------------------------------------------------------------------------------------------------------------------------------------------------------------|-----------------------|
| GROUP NAME               | <b>LEG – LEGOS, Laboratoire d'Etudes en Géophysique et Océanographie Spatiales</b>                                                                                                                                                                    |                       |
| AUTHORS and AFFILIATIONS | <b>Etienne Berthier<sup>1</sup></b><br><sup>1</sup> Université de Toulouse, LEGOS (CNES/CNRS/IRD/UPS), Toulouse, France                                                                                                                               |                       |
| GLACIER                  | <b>Hintereisferner (HEF), Grosser Aletschgletscher (ALE), Baltoro (BAL)</b>                                                                                                                                                                           |                       |
| GROUP-#                  | LEG-1                                                                                                                                                                                                                                                 |                       |
| QUALITY FLAG             | —                                                                                                                                                                                                                                                     |                       |
| SOURCE                   | ASTER                                                                                                                                                                                                                                                 |                       |
| DEM                      | Provided DEMs                                                                                                                                                                                                                                         |                       |
| PROCESSING (dh)          | DEM difference                                                                                                                                                                                                                                        |                       |
| REFERENCE DEM            | For HEF and ALE:<br>Oldest of the two compared ASTER DEMs                                                                                                                                                                                             | BAL<br>Copernicus DEM |
| COREGISTRATION           | Berthier et al., 2007                                                                                                                                                                                                                                 |                       |
| BIAS                     | Correction for the across and along track shifts inspired by Gardelle et al. (2013) improved by fitting a spline to the residuals along track.                                                                                                        |                       |
| FILTERING                | Values outside $\pm 10$ m/yr are filtered out in the final $dh/dt$ map and considered as data void. To compute the glacier-wide average, in each altitude band, values outside 3 standard deviation of the mean elevation difference are filtered out |                       |

|                        |                                                                                                                                                                                                                                                                                                                                                                                                                                                                                                                                                                                                                                                       |
|------------------------|-------------------------------------------------------------------------------------------------------------------------------------------------------------------------------------------------------------------------------------------------------------------------------------------------------------------------------------------------------------------------------------------------------------------------------------------------------------------------------------------------------------------------------------------------------------------------------------------------------------------------------------------------------|
| VOID-FILLING           | A local hypsometric method, as defined by (McNabb et al., 2019), using 100 m elevation intervals                                                                                                                                                                                                                                                                                                                                                                                                                                                                                                                                                      |
| RADAR PENETRATION      | Not applicable                                                                                                                                                                                                                                                                                                                                                                                                                                                                                                                                                                                                                                        |
| TEMPORAL               | To take into account the missing (Aletsch) or excess (Hintereisferner) year, the glacier-wide mean elevation during this year was corrected using the regional mass balance anomaly of Central Europe taken from (Zemp et al., 2019, 2010)                                                                                                                                                                                                                                                                                                                                                                                                            |
| UNCERTAINTY (dh_sigma) | The total uncertainty is computed by considering four sources of uncertainties: <ul style="list-style-type: none"> <li>the elevation changes for measured pixels, quantified using the patch method as described in the supplement of Wagnon et al. (2021).</li> <li>the elevation changed for unmeasured pixels, using a factor 5 from Berthier et al. (2014)</li> <li>the inventory, assuming a 10% error at the 95 CI (the 5% value from Paul et al. (2013) multiplied by two).</li> <li>the “temporal” correction, i.e., our measurement period misses one full year for Aletsch (or includes an additional year for Hintereisferner).</li> </ul> |

**Table S10. LMI spaceborne results.**

|                          |                                                                                                                                                                                                                                                                                                                                                                                                                                                                                                   |
|--------------------------|---------------------------------------------------------------------------------------------------------------------------------------------------------------------------------------------------------------------------------------------------------------------------------------------------------------------------------------------------------------------------------------------------------------------------------------------------------------------------------------------------|
| GROUP NAME               | <b>LMI – National Land Survey of Iceland</b>                                                                                                                                                                                                                                                                                                                                                                                                                                                      |
| AUTHORs and AFFILIATIONs | <b>Joaquín M.C. Belart<sup>1,2</sup></b><br><sup>1</sup> National Land Survey of Iceland, Akranes, Iceland<br><sup>2</sup> Institute of Earth Sciences, University of Iceland, Reykjavík, Iceland                                                                                                                                                                                                                                                                                                 |
| GLACIER                  | <b>Hintereisferner, Grosser Aletschgletscher</b>                                                                                                                                                                                                                                                                                                                                                                                                                                                  |
| GROUP-#                  | LMI-1                                                                                                                                                                                                                                                                                                                                                                                                                                                                                             |
| QUALITY FLAG             | —                                                                                                                                                                                                                                                                                                                                                                                                                                                                                                 |
| SOURCE                   | ASTER                                                                                                                                                                                                                                                                                                                                                                                                                                                                                             |
| DEM                      | Provided DEM time series                                                                                                                                                                                                                                                                                                                                                                                                                                                                          |
| PROCESSING (dh)          | The generation of the dh map was done using the steps described in Hugonnet et al. (2021), specifically: 1) DEM co-registration, 2) DEM stacking, 3) DEM filtering and 4) spatiotemporal homogenisation using Gaussian Process regression.<br>The processing was done with the original spatial resolution of the DEMs (30x30 m) and with a time interval for temporal interpolation of 15 days. Volume changes were obtained from the average dh of the glacier, multiplied by the glacier area. |
| REFERENCE DEM            | Copernicus DEM                                                                                                                                                                                                                                                                                                                                                                                                                                                                                    |
| COREGISTRATION           | Nuth and Kääb (2011); Shean et al. (2016)                                                                                                                                                                                                                                                                                                                                                                                                                                                         |
| BIAS                     | Not applicable                                                                                                                                                                                                                                                                                                                                                                                                                                                                                    |
| FILTERING                | The stack of ASTER DEMs was filtered using the spatial filter from Hugonnet et al. (2021), equation S1.                                                                                                                                                                                                                                                                                                                                                                                           |
| VOID-FILLING             | The Gaussian Process regression yielded a stack of spatially-filled synthetic DEMs; therefore, no gap-filling was needed for the processing.                                                                                                                                                                                                                                                                                                                                                      |
| RADAR PENETRATION        | Not applicable                                                                                                                                                                                                                                                                                                                                                                                                                                                                                    |
| TEMPORAL                 | The Gaussian Process regression yielded a stack of synthetic DEMs every 15 days. The closest DEMs to the desired time period were: <ul style="list-style-type: none"> <li>Alesch: 16 September 2011 and 16 September 2017</li> <li>Hintereisferner: 2 October 2010 and 17 September 2019</li> <li>No further temporal corrections were done in this test</li> </ul>                                                                                                                               |
| UNCERTAINTY              | The uncertainties (95% confidence interval) of the volume change were estimated using the methods described in Magnússon et al. (2016).                                                                                                                                                                                                                                                                                                                                                           |



**Table S11. UGA spaceborne results.**

|                          |                                                                                                                                                                                                                                                                                                                                                                                                                                                                                                                                                                                                                                                                                                                                                                     |                                                                                                                                                                                                                                              |                                                                                                                                                                                            |                                                                                                 |
|--------------------------|---------------------------------------------------------------------------------------------------------------------------------------------------------------------------------------------------------------------------------------------------------------------------------------------------------------------------------------------------------------------------------------------------------------------------------------------------------------------------------------------------------------------------------------------------------------------------------------------------------------------------------------------------------------------------------------------------------------------------------------------------------------------|----------------------------------------------------------------------------------------------------------------------------------------------------------------------------------------------------------------------------------------------|--------------------------------------------------------------------------------------------------------------------------------------------------------------------------------------------|-------------------------------------------------------------------------------------------------|
| GROUP NAME               | <b>UGA – Université Grenoble Alpes</b>                                                                                                                                                                                                                                                                                                                                                                                                                                                                                                                                                                                                                                                                                                                              |                                                                                                                                                                                                                                              |                                                                                                                                                                                            |                                                                                                 |
| AUTHORs and AFFILIATIONS | <b>Amaury Dehecq<sup>1</sup>, Friedrich Knuth<sup>2</sup>, Shashank Bhushan<sup>2</sup>, David Shean<sup>2</sup>, Erik Mannerfelt<sup>3,4</sup>, Romain Hugonnet<sup>3,4,5</sup></b><br><sup>1</sup> Univ. Grenoble Alpes, IRD, CNRS, INRAE, Grenoble INP, IGE, 38000 Grenoble, France<br><sup>2</sup> University of Washington, Department of Civil and Environmental Engineering, Seattle, WA, USA<br><sup>3</sup> Laboratory of Hydraulics, Hydrology and Glaciology (VAW), ETH Zurich, Zurich, Switzerland.<br><sup>4</sup> Swiss Federal Institute for Forest, Snow and Landscape Research (WSL), Birmensdorf, Switzerland.<br><sup>5</sup> Centre d'Etudes Spatiales de la Biosphère, CESBIO, Univ. Toulouse, CNES/CNRS/INRA/IRD/UPS, 31401 Toulouse, France. |                                                                                                                                                                                                                                              |                                                                                                                                                                                            |                                                                                                 |
| GLACIER                  | <b>Hintereisferner, Grosser Aletschgletscher, Vestisen, Baltoro, Northern Patagonian Icefield</b>                                                                                                                                                                                                                                                                                                                                                                                                                                                                                                                                                                                                                                                                   |                                                                                                                                                                                                                                              |                                                                                                                                                                                            |                                                                                                 |
| GROUP-#                  | UGA-1                                                                                                                                                                                                                                                                                                                                                                                                                                                                                                                                                                                                                                                                                                                                                               | UGA-2                                                                                                                                                                                                                                        | UGA-3                                                                                                                                                                                      | UGA-4                                                                                           |
| QUALITY FLAG             | Low confidence for VES, BAL, and NPI due to insufficient coverage for the automatic (experimental) DEM selection.                                                                                                                                                                                                                                                                                                                                                                                                                                                                                                                                                                                                                                                   | Low confidence for VES, BAL, and NPI due to insufficient coverage for the automatic (experimental) DEM selection.                                                                                                                            | —                                                                                                                                                                                          | —                                                                                               |
| SOURCE                   | ASTER                                                                                                                                                                                                                                                                                                                                                                                                                                                                                                                                                                                                                                                                                                                                                               |                                                                                                                                                                                                                                              |                                                                                                                                                                                            |                                                                                                 |
| DEM                      | Provided DEMs                                                                                                                                                                                                                                                                                                                                                                                                                                                                                                                                                                                                                                                                                                                                                       |                                                                                                                                                                                                                                              |                                                                                                                                                                                            |                                                                                                 |
| PROCESSING (dh)          | <ul style="list-style-type: none"> <li>Select DEMs within <math>\pm 400</math> days around validation dates and selected months (Aug, Sep, Oct)</li> <li>Keep DEM with the best coverage over ROI for each validation date (no mosaicking)</li> <li>DEM difference</li> </ul>                                                                                                                                                                                                                                                                                                                                                                                                                                                                                       | <ul style="list-style-type: none"> <li>Select DEMs within <math>\pm 400</math> days around validation dates and selected months (Aug, Sep, Oct)</li> <li>Calculate the median of all DEMs for each validation date DEM difference</li> </ul> | <ul style="list-style-type: none"> <li>Select all DEMs between the validation dates + 365 days at each end.</li> <li>Theil-Sen regression</li> </ul>                                       | <ul style="list-style-type: none"> <li>Select all DEMs</li> <li>Theil-Sen regression</li> </ul> |
| REFERENCE DEM            | Provided Copernicus DEM                                                                                                                                                                                                                                                                                                                                                                                                                                                                                                                                                                                                                                                                                                                                             |                                                                                                                                                                                                                                              |                                                                                                                                                                                            |                                                                                                 |
| COREGISTRATION           | The scripts to calculate glacier mass balance as part of the IACS RAGMAC are available at <a href="https://github.com/adehecq/ragmac_xdem">https://github.com/adehecq/ragmac_xdem</a> . Correct horizontal shift using Nuth and Kääb (2011) algorithm ( <a href="https://xdem.readthedocs.io/">xdem</a> implementation, <a href="https://xdem.readthedocs.io/">https://xdem.readthedocs.io/</a> )<br>We use pixels outside RGI outlines, with slope < 50 degree and elevation diff < 5 NMAD of all off-glacier pixels.                                                                                                                                                                                                                                              |                                                                                                                                                                                                                                              |                                                                                                                                                                                            |                                                                                                 |
| BIAS                     | In addition to co-registration, we applied the following bias corrections: <ul style="list-style-type: none"> <li>remove degree 1 spatial polynomial vertical bias</li> <li>remove median vertical bias.</li> </ul>                                                                                                                                                                                                                                                                                                                                                                                                                                                                                                                                                 |                                                                                                                                                                                                                                              |                                                                                                                                                                                            |                                                                                                 |
| FILTERING                | Spatial filter from Hugonnet et al. (2021), equation S1. In brief, we exclude pixels for which the absolute elevation difference to the maximum or minimum reference elevation found within a disk $D$ of radius $r$ was larger than a vertical elevation threshold $\Delta h$ . This is done sequentially for three sets of $r$ and $\Delta h$ values: (200, 700), (500, 500), (1000, 300).                                                                                                                                                                                                                                                                                                                                                                        |                                                                                                                                                                                                                                              |                                                                                                                                                                                            |                                                                                                 |
|                          | —                                                                                                                                                                                                                                                                                                                                                                                                                                                                                                                                                                                                                                                                                                                                                                   | —                                                                                                                                                                                                                                            | During temporal regression, pixels with less than 5 observations or with time separation between the first and last dates less than 50% of the validation period or 4 years, are excluded. |                                                                                                 |
| VOID-FILLING             | Regional hypsometric approach:<br>i) We group all pixels of all glaciers in the ROI into 100 m elevation bins.                                                                                                                                                                                                                                                                                                                                                                                                                                                                                                                                                                                                                                                      |                                                                                                                                                                                                                                              |                                                                                                                                                                                            |                                                                                                 |

|                        |                                                                                                                                                                                                                                                                                                                                                                                                                                                                                                                                                                                                                                                                                                                                                                                                                                                                                                                                                                                                                                                                                        |                                                                                                                                                  |
|------------------------|----------------------------------------------------------------------------------------------------------------------------------------------------------------------------------------------------------------------------------------------------------------------------------------------------------------------------------------------------------------------------------------------------------------------------------------------------------------------------------------------------------------------------------------------------------------------------------------------------------------------------------------------------------------------------------------------------------------------------------------------------------------------------------------------------------------------------------------------------------------------------------------------------------------------------------------------------------------------------------------------------------------------------------------------------------------------------------------|--------------------------------------------------------------------------------------------------------------------------------------------------|
|                        | ii) We calculate the median elevation change of all pixels in each bin. We exclude pixels with a slope > 45 degrees.<br>iii) Bins with less than 10 observations are excluded.<br>iv) Missing bins are filled using a linear interpolation. In case of missing bins on the edges, the nearest value is used.<br>v) All pixels with non-valid observations are replaced by the median value of their corresponding elevation bin.                                                                                                                                                                                                                                                                                                                                                                                                                                                                                                                                                                                                                                                       |                                                                                                                                                  |
| RADAR PENETRATION      | Not applicable                                                                                                                                                                                                                                                                                                                                                                                                                                                                                                                                                                                                                                                                                                                                                                                                                                                                                                                                                                                                                                                                         |                                                                                                                                                  |
| TEMPORAL               | —                                                                                                                                                                                                                                                                                                                                                                                                                                                                                                                                                                                                                                                                                                                                                                                                                                                                                                                                                                                                                                                                                      | Elevation change rate (dh/dt) was calculated during regression, and then elevation change (dh) was calculated exactly for the validation period. |
| UNCERTAINTY (dh_sigma) | We account for uncertainties in a) the mean elevation changes $\sigma_{<\Delta h>}$ b) area uncertainties $\sigma_A$ c) uncertainties related to the interpolation of missing values $\sigma_{\text{interp}}$ . Each uncertainty is detailed below.<br>a) We calculate the standard error of the mean, assuming a spatial correlation length of errors of 500 m, following the method of Rolstad et al. (2009) and as implemented in xDEM.<br>b) Calculated in a way similar to Hugonnet et al. (2021), i.e. a buffer of 30 m is added around the RGI outlines. The relative error in the area is calculated as $\sigma_A = (A_{\text{RGI}+30} - A_{\text{RGI}}) / A_{\text{RGI}}$ .<br>c) The uncertainty for missing values is considered as 5 times the uncertainty of measured pixels, as in Berthier et al. (2014). We call p the proportion of measured pixels.<br>The final uncertainty in volume change is calculated as<br>$\sigma_{\Delta V} = \text{sqrt}(\sigma_{<\Delta h>}(p + 5(1 - p))A)^2 + (\sigma_A <\Delta h >)^2$<br>All reported errors are provided as 2-sigma. |                                                                                                                                                  |

**Table S12. UIO spaceborne results.**

|                          |                                                                                                                                                                                                                                                                                                                                                                                                                                                                                                          |                 |       |                                                                |                                                                                                                                                                                                                                                                                 |
|--------------------------|----------------------------------------------------------------------------------------------------------------------------------------------------------------------------------------------------------------------------------------------------------------------------------------------------------------------------------------------------------------------------------------------------------------------------------------------------------------------------------------------------------|-----------------|-------|----------------------------------------------------------------|---------------------------------------------------------------------------------------------------------------------------------------------------------------------------------------------------------------------------------------------------------------------------------|
| GROUP NAME               | <b>UIO – University of Oslo</b>                                                                                                                                                                                                                                                                                                                                                                                                                                                                          |                 |       |                                                                |                                                                                                                                                                                                                                                                                 |
| AUTHORs and AFFILIATIONs | <b>Livia Piermattei<sup>1,2</sup>, Désirée Treichler<sup>2</sup>, Ruitang Yang<sup>2</sup>, Luc Girod<sup>2</sup>, Robert McNabb<sup>3</sup>, Andreas Käab<sup>2</sup></b><br><sup>1</sup> Department of Land Change Science, Swiss Federal Institute for Forest, Snow and Landscape Research WSL, Birmensdorf, Switzerland<br><sup>2</sup> Department of Geosciences, University of Oslo, Oslo, Norway<br><sup>3</sup> School of Geography and Environmental Sciences, Ulster University, Coleraine, UK |                 |       |                                                                |                                                                                                                                                                                                                                                                                 |
| GLACIER                  | <b>Hintereisferner</b>                                                                                                                                                                                                                                                                                                                                                                                                                                                                                   |                 |       |                                                                |                                                                                                                                                                                                                                                                                 |
| GROUP-#                  | UIO-1                                                                                                                                                                                                                                                                                                                                                                                                                                                                                                    | UIO-2           | UIO-3 | UIO-4                                                          | UIO-5                                                                                                                                                                                                                                                                           |
| QUALITY FLAG             | —                                                                                                                                                                                                                                                                                                                                                                                                                                                                                                        | —               | —     | —                                                              | Low confidence: <ul style="list-style-type: none"> <li>• Unrealistic (i.e. large positive) mean elevation change along the all-orographic right of the glacier tongue.</li> <li>• Elevation change rate over 7 years (0.51 m/yr) is too small for an alpine glacier.</li> </ul> |
| SOURCE                   | ASTER, TanDEM-X                                                                                                                                                                                                                                                                                                                                                                                                                                                                                          | ASTER, TanDEM-X | ASTER | ASTER                                                          |                                                                                                                                                                                                                                                                                 |
| DEM                      | Provided pair DEMs                                                                                                                                                                                                                                                                                                                                                                                                                                                                                       |                 |       | Provided DEMs time series (only summer months, July-October)   |                                                                                                                                                                                                                                                                                 |
| PROCESSING (dh)          | DEM differencing (DEMdiff)                                                                                                                                                                                                                                                                                                                                                                                                                                                                               |                 |       | Median elevation within fixed elevation bands (100 m)          |                                                                                                                                                                                                                                                                                 |
|                          |                                                                                                                                                                                                                                                                                                                                                                                                                                                                                                          |                 |       | Linear interpolation                                           | RANSAC linear interpolation                                                                                                                                                                                                                                                     |
| REFERENCE DEM            | Copernicus DEM as reference for co-registration                                                                                                                                                                                                                                                                                                                                                                                                                                                          |                 |       |                                                                |                                                                                                                                                                                                                                                                                 |
| COREGISTRATION           | Full 3D affine transformation parameters (OpalsLSM, Pfeifer et al., 2014) on stable terrain defined as off-RGI                                                                                                                                                                                                                                                                                                                                                                                           |                 |       | Nuth and Käab (2011) on stable terrain defined as off-RGI area |                                                                                                                                                                                                                                                                                 |

|                   |                                                                                                                                                            |                                   |                                                                                                                                                                                                    |
|-------------------|------------------------------------------------------------------------------------------------------------------------------------------------------------|-----------------------------------|----------------------------------------------------------------------------------------------------------------------------------------------------------------------------------------------------|
|                   | area, excluding cells with slope values greater than 40°                                                                                                   |                                   |                                                                                                                                                                                                    |
| BIAS              | —                                                                                                                                                          |                                   |                                                                                                                                                                                                    |
| FILTERING         | 5x5 median filter of the DEMdiff.<br>Outliers = pixels where the abs. difference between the DEMdiff and the median DEMdiff > the std of their differences |                                   | Outlier = DEMdiff between the ASTER DEM and the reference DEM > 100 m                                                                                                                              |
| VOID-FILLING      | hypsoetry of DEMdiff (mean, elevation bin 50 m)                                                                                                            | IDW of DEMdiff                    | —                                                                                                                                                                                                  |
| RADAR PENETRATION | Not applicable                                                                                                                                             |                                   |                                                                                                                                                                                                    |
| TEMPORAL          | —                                                                                                                                                          | annual correction using WGMS data | annual correction using WGMS data                                                                                                                                                                  |
| UNCERTAINTY       | One NMAD of the elevation change off-glacier                                                                                                               |                                   | The area-weighted mean of the RMSE of the residuals between the measured elevation (i.e. from the DEM) and the predicted elevation by the regression. The uncertainty of the DEM is not considered |

|                          |                                                                                                                                                                                                                                                                                                                                                                                                                                                                         |       |                                                                                                                                                                                  |                                                                                                                                                                                                                                                                              |       |                                     |       |
|--------------------------|-------------------------------------------------------------------------------------------------------------------------------------------------------------------------------------------------------------------------------------------------------------------------------------------------------------------------------------------------------------------------------------------------------------------------------------------------------------------------|-------|----------------------------------------------------------------------------------------------------------------------------------------------------------------------------------|------------------------------------------------------------------------------------------------------------------------------------------------------------------------------------------------------------------------------------------------------------------------------|-------|-------------------------------------|-------|
| GROUP NAME               | <b>UIO – University of Oslo</b>                                                                                                                                                                                                                                                                                                                                                                                                                                         |       |                                                                                                                                                                                  |                                                                                                                                                                                                                                                                              |       |                                     |       |
| AUTHORS and AFFILIATIONS | <b>Livia Piermattei<sup>1,2</sup>, Désirée Treichler<sup>2</sup>, Ruitang Yang<sup>2</sup>, Luc Girod<sup>2</sup>, Robert McNabb<sup>3</sup>, Andreas Kääh<sup>2</sup></b><br>1 Department of Land Change Science, Swiss Federal Institute for Forest, Snow and Landscape Research WSL, Birmensdorf, Switzerland<br>2 Department of Geosciences, University of Oslo, Oslo, Norway<br>3 School of Geography and Environmental Sciences, Ulster University, Coleraine, UK |       |                                                                                                                                                                                  |                                                                                                                                                                                                                                                                              |       |                                     |       |
| GLACIER                  | <b>Vestisen</b>                                                                                                                                                                                                                                                                                                                                                                                                                                                         |       |                                                                                                                                                                                  |                                                                                                                                                                                                                                                                              |       |                                     |       |
| GROUP-#                  | UIO-1                                                                                                                                                                                                                                                                                                                                                                                                                                                                   | UIO-2 | UIO-3                                                                                                                                                                            | UIO-4                                                                                                                                                                                                                                                                        | UIO-5 | RUIO-6                              | UIO-7 |
| QUALITY FLAG             | Low confidence:<br>Due to extensive data voids and very few cells in certain elevation bands, massive interpolation is required. Thus, it is difficult to assess the accuracy of the glacier elevation change, even considering the glacier complex for hypsometric interpolation (Fig. A6, labelled UIO-1 & UIO-2).                                                                                                                                                    |       | Low confidence:<br>Due to extensive data voids and remaining noise, the IDW interpolation provided an unrealistic glacier elevation change pattern (Fig. A6, labelled as UIO-3). | Low confidence:<br>The RANSAC linear interpolation applied to the time series for individual glaciers yielded elevation changes exhibiting unrealistic patterns, such as opposite values on the same elevation band for the neighbouring glaciers (Fig. A6, labelled UIO-4). | —     | —                                   | —     |
| SOURCE                   | ASTER                                                                                                                                                                                                                                                                                                                                                                                                                                                                   |       |                                                                                                                                                                                  |                                                                                                                                                                                                                                                                              |       |                                     |       |
| DEM                      | Provided pair DEMs                                                                                                                                                                                                                                                                                                                                                                                                                                                      |       |                                                                                                                                                                                  | Provided DEMs time series (only summer months, July-October)                                                                                                                                                                                                                 |       | Processed pair DEMs                 |       |
| PROCESSING (dh)          | DEM differencing (DEMdiff)                                                                                                                                                                                                                                                                                                                                                                                                                                              |       |                                                                                                                                                                                  | Median elevation within fixed elevation bands (100 m)                                                                                                                                                                                                                        |       | ASTER images processed with MMASTER |       |

|                   |                                                                                                                                                                                   |                                                                                                                                                                                                |                 |                                                                 |
|-------------------|-----------------------------------------------------------------------------------------------------------------------------------------------------------------------------------|------------------------------------------------------------------------------------------------------------------------------------------------------------------------------------------------|-----------------|-----------------------------------------------------------------|
|                   |                                                                                                                                                                                   | individual glacier                                                                                                                                                                             | glacier complex |                                                                 |
|                   |                                                                                                                                                                                   | RANSAC linear interpolation                                                                                                                                                                    |                 |                                                                 |
| REFERENCE DEM     | Copernicus DEM as reference for co-registration                                                                                                                                   |                                                                                                                                                                                                |                 |                                                                 |
| COREGISTRATION    | Full 3D affine transformation parameters (OpalsLSM, Pfeifer et al. 2014) on stable terrain defined as the off-RGI area, excluding cells with slope values greater than 40 degrees | Nuth and Kääb (2011) on stable terrain defined as off-RGI area                                                                                                                                 |                 | Nuth and Kääb (2011) OpalsLSM                                   |
| BIAS              | —                                                                                                                                                                                 |                                                                                                                                                                                                |                 | Remove satellite jitter                                         |
| FILTERING         | 5x5 median filter of the DEMdiff. Outliers = pixels where the abs. difference between the DEMdiff and the median DEMdiff > the std of their differences                           | Outlier = DEMdiff between the ASTER DEM and the reference DEM > 100 m                                                                                                                          |                 | —                                                               |
| VOID FILLING      | hypsometry of DEMdiff (mean elevation bin 50 m)                                                                                                                                   | IDW of DEMdiff (glacier complex)                                                                                                                                                               | —               | Hypsometry of DEMdiff (mean elevation bin 50 m) glacier complex |
|                   | individual glacier                                                                                                                                                                | glacier complex                                                                                                                                                                                |                 |                                                                 |
| RADAR PENETRATION | Not applicable                                                                                                                                                                    |                                                                                                                                                                                                |                 |                                                                 |
| TEMPORAL          | —                                                                                                                                                                                 |                                                                                                                                                                                                |                 |                                                                 |
| UNCERTAINTY       | One NMAD of the elevation change off-glacier                                                                                                                                      | Area-weighted mean of the RMSE of the residuals between the measured elevation (i.e. from the DEM) and the predicted elevation by the regression. The uncertainty of the DEM is not considered |                 | —                                                               |

**Table S13. USG spaceborne results.**

|                          |                                                                                                                                                                                                                                                                              |                                                                                                                     |          |         |
|--------------------------|------------------------------------------------------------------------------------------------------------------------------------------------------------------------------------------------------------------------------------------------------------------------------|---------------------------------------------------------------------------------------------------------------------|----------|---------|
| GROUP                    | USG – United States Geological Survey                                                                                                                                                                                                                                        |                                                                                                                     |          |         |
| AUTHORS and AFFILIATIONS | Christopher McNeil <sup>1</sup> , Caitlyn Florentine <sup>2</sup> , Louis Sass <sup>1</sup><br><sup>1</sup> US Geological Survey Alaska Science Center, Anchorage, AK, USA<br><sup>2</sup> US Geological Survey Northern Rocky Mountain Science Center, West Glacier MT, USA |                                                                                                                     |          |         |
| GLACIER                  | Hintereisferner                                                                                                                                                                                                                                                              | Grosser Aletschgletscher                                                                                            | Vestisen | Baltoro |
| GROUP-#                  | USG-1                                                                                                                                                                                                                                                                        | USG-1                                                                                                               | USG-1    | USG-1   |
| QUALITY FLAG             | —                                                                                                                                                                                                                                                                            | Low confidence: This result is flagged as low confidence due to the mixed-use of TanDEM-X and ASTER elevation data. | —        | —       |
| SOURCE                   | ASTER                                                                                                                                                                                                                                                                        | TanDEM-X /ASTER                                                                                                     | TanDEM-X | ASTER   |
| DEM                      | Provided pair DEMs                                                                                                                                                                                                                                                           |                                                                                                                     |          |         |
| PROCESSING (dh)          | DEM differencing was performed on a pixel-to-pixel basis, using a bilinear interpolation to resample each selected, co-registered DEM (ASTER or TanDEM-X) to the greater (coarser) resolution of the reference Copernicus DEM.                                               |                                                                                                                     |          |         |
| REFERENCE DEM            | Copernicus DEM as reference for co-registration                                                                                                                                                                                                                              |                                                                                                                     |          |         |

|                        |                                                                                                                                                                                                                                                                                                                                                                                                                                                                                                                                                                                                                                                                                                                                                                                                                                                                                                                                                                                                                                                                                                                                                                                                                                                                                                                                                                                                                                                                                                                                                                                                                                                                                                                  |
|------------------------|------------------------------------------------------------------------------------------------------------------------------------------------------------------------------------------------------------------------------------------------------------------------------------------------------------------------------------------------------------------------------------------------------------------------------------------------------------------------------------------------------------------------------------------------------------------------------------------------------------------------------------------------------------------------------------------------------------------------------------------------------------------------------------------------------------------------------------------------------------------------------------------------------------------------------------------------------------------------------------------------------------------------------------------------------------------------------------------------------------------------------------------------------------------------------------------------------------------------------------------------------------------------------------------------------------------------------------------------------------------------------------------------------------------------------------------------------------------------------------------------------------------------------------------------------------------------------------------------------------------------------------------------------------------------------------------------------------------|
| COREGISTRATION         | Co-registration was executed using methods described by Nuth and Kääb (2011) and automated by Shean et al. (2016) via the demcoreg tool to minimise elevation differences between DEMs across stable terrain. Stable terrain was automatically selected using the Copernicus Global Land Cover dataset (Buchhorn et al., 2020) and the Randolph Glacier Inventory (RGI Consortium, 2017) to mask out heavily vegetated and glacierised areas. Stable co-registration areas were restricted to areas with slope < 40°. Each DEM was iteratively shifted to minimise residual differences from the reference DEM (Nuth and Kääb, 2011) until the applied shifts in the northing, easting, and vertical dimensions reached the minimum tolerance of 0.1 m.                                                                                                                                                                                                                                                                                                                                                                                                                                                                                                                                                                                                                                                                                                                                                                                                                                                                                                                                                          |
| BIAS                   | —                                                                                                                                                                                                                                                                                                                                                                                                                                                                                                                                                                                                                                                                                                                                                                                                                                                                                                                                                                                                                                                                                                                                                                                                                                                                                                                                                                                                                                                                                                                                                                                                                                                                                                                |
| FILTERING              | —                                                                                                                                                                                                                                                                                                                                                                                                                                                                                                                                                                                                                                                                                                                                                                                                                                                                                                                                                                                                                                                                                                                                                                                                                                                                                                                                                                                                                                                                                                                                                                                                                                                                                                                |
| VOID-FILLING           | Gap filling was performed on DEMs with < 95% glacier coverage using the ‘Local Hypsometry – Mean elevation difference by elevation bin’ method (McNabb et al., 2019).                                                                                                                                                                                                                                                                                                                                                                                                                                                                                                                                                                                                                                                                                                                                                                                                                                                                                                                                                                                                                                                                                                                                                                                                                                                                                                                                                                                                                                                                                                                                            |
| RADAR PENETRATION      | Not applicable                                                                                                                                                                                                                                                                                                                                                                                                                                                                                                                                                                                                                                                                                                                                                                                                                                                                                                                                                                                                                                                                                                                                                                                                                                                                                                                                                                                                                                                                                                                                                                                                                                                                                                   |
| TEMPORAL               | —                                                                                                                                                                                                                                                                                                                                                                                                                                                                                                                                                                                                                                                                                                                                                                                                                                                                                                                                                                                                                                                                                                                                                                                                                                                                                                                                                                                                                                                                                                                                                                                                                                                                                                                |
| UNCERTAINTY (dh_sigma) | <p>Glacier area error was calculated using the RGI inverse power law uncertainty function described by (Pfeffer and others, 2014) for the designated RGI glacier(s) for each site. Glacier elevation change errors reflect the area-weighted average of Normalized Median Absolute Deviation (NMAD) and the Mean Absolute Error (MAE) of observed vs predicted values from the specific interpolation function applied to each glacier (Höhle and Höhle, 2009; McNeil et al., 2020; O’Neel et al., 2019).</p> <p>The NMAD reflects random elevation error of any pixel across the DEM-differenced elevation change grid (Shean et al., 2016). The MAE reflects the error of any interpolated elevation value, i.e. void fill. These two elevation uncertainty components were weighted by the fraction of the glacier area covered by the DEM:</p> $dh\sigma = NMAD(1-f) + (MAE + NMAD)f$ <p>where <math>f</math> is the fraction of the glacier area that required interpolation and <math>1-f</math> is the fraction of the glacier area that did not require interpolation. The total combined elevation change error (<math>dh\sigma</math>) was calculated for each individual DEM and then summed in quadrature for DEM differences. The void fill error provided in error results is the <math>(MAE + NMAD)f</math> term of this equation.</p> <p>For glaciers with &gt; 95% data coverage, no interpolation was applied. Accordingly, the NMAD represents 100% of the uncertainty in mean elevation change for DEM differences where less than 5% of the glacier area was missing. Uncertainties in glacier volume change were calculated by summing area and elevation change errors in quadrature.</p> |

**Table S14. UST spaceborne results.**

|                          |                                                                                                                                                                                                                                                                                                                                                                                                                                                                                                                                                                                                                                                                                                                                                                                                                                                                                          |       |       |       |                                     |       |       |       |
|--------------------------|------------------------------------------------------------------------------------------------------------------------------------------------------------------------------------------------------------------------------------------------------------------------------------------------------------------------------------------------------------------------------------------------------------------------------------------------------------------------------------------------------------------------------------------------------------------------------------------------------------------------------------------------------------------------------------------------------------------------------------------------------------------------------------------------------------------------------------------------------------------------------------------|-------|-------|-------|-------------------------------------|-------|-------|-------|
| GROUP NAME               | <b>UST – University of St. Andrews</b>                                                                                                                                                                                                                                                                                                                                                                                                                                                                                                                                                                                                                                                                                                                                                                                                                                                   |       |       |       |                                     |       |       |       |
| AUTHORs and AFFILIATIONs | <b>Tobias Bolch<sup>1,2</sup>, Gregoire Guillet<sup>1,3,4</sup>, Atanu Bhattacharya<sup>1,5</sup>, Daniel Falaschi<sup>1,6</sup>, Owen King<sup>1</sup>, Sajid Ghuffar<sup>1,7</sup></b><br><sup>1</sup> School of Geography and Sustainable Development, University of St Andrews, Scotland, UK<br><sup>2</sup> Institute of Geodesy, Graz University of Technology, Graz, Austria<br><sup>3</sup> Civil and Environmental Engineering, University of Washington, Seattle, WA, USA<br><sup>4</sup> Department of Geosciences, University of Oslo, Oslo, 0371, Norway<br><sup>5</sup> Department of Earth Sciences and Remote Sensing, JIS University, Kolkata, India<br><sup>6</sup> Instituto Argentino de Nivología, Glaciología y Ciencias Ambientales (IANIGLA), Mendoza, Argentina<br><sup>7</sup> Department of Space Science, Institute of Space Technology, Islamabad, Pakistan |       |       |       |                                     |       |       |       |
| GLACIER                  | <b>Baltoro</b>                                                                                                                                                                                                                                                                                                                                                                                                                                                                                                                                                                                                                                                                                                                                                                                                                                                                           |       |       |       | <b>Northern Patagonian Icefield</b> |       |       |       |
| GROUP-#                  | UST-1                                                                                                                                                                                                                                                                                                                                                                                                                                                                                                                                                                                                                                                                                                                                                                                                                                                                                    | UST-2 | UST-3 | UST-4 | UST-1                               | UST-2 | UST-3 | UST-4 |
| QUALITY FLAG             | —                                                                                                                                                                                                                                                                                                                                                                                                                                                                                                                                                                                                                                                                                                                                                                                                                                                                                        | —     | —     | —     | —                                   | —     | —     | —     |
| SOURCE                   | SRTM/ASTER; ASTER/ASTER                                                                                                                                                                                                                                                                                                                                                                                                                                                                                                                                                                                                                                                                                                                                                                                                                                                                  |       |       |       | SRTM/ASTER; ASTER/TanDEM-X          |       |       |       |
| DEM                      | Provided DEMs                                                                                                                                                                                                                                                                                                                                                                                                                                                                                                                                                                                                                                                                                                                                                                                                                                                                            |       |       |       |                                     |       |       |       |
| PROCESSING (dh)          | DEM differencing was performed on a pixel-to-pixel basis                                                                                                                                                                                                                                                                                                                                                                                                                                                                                                                                                                                                                                                                                                                                                                                                                                 |       |       |       |                                     |       |       |       |

|                                     |                                                                                                                                                                                                                                                                                                                                                                                                                                                                                                                                                                                                                                                                                                                                                                                                                                                                                                                                                                                                                                                                                                                                                                                                                                                                                                                                                                                                                                                                                                                                                                                                                                                                                                                                                                                                                                                                                              |                                                                                                                                                                                                                                                                                                                                                                                                   |                                                                                                                                           |
|-------------------------------------|----------------------------------------------------------------------------------------------------------------------------------------------------------------------------------------------------------------------------------------------------------------------------------------------------------------------------------------------------------------------------------------------------------------------------------------------------------------------------------------------------------------------------------------------------------------------------------------------------------------------------------------------------------------------------------------------------------------------------------------------------------------------------------------------------------------------------------------------------------------------------------------------------------------------------------------------------------------------------------------------------------------------------------------------------------------------------------------------------------------------------------------------------------------------------------------------------------------------------------------------------------------------------------------------------------------------------------------------------------------------------------------------------------------------------------------------------------------------------------------------------------------------------------------------------------------------------------------------------------------------------------------------------------------------------------------------------------------------------------------------------------------------------------------------------------------------------------------------------------------------------------------------|---------------------------------------------------------------------------------------------------------------------------------------------------------------------------------------------------------------------------------------------------------------------------------------------------------------------------------------------------------------------------------------------------|-------------------------------------------------------------------------------------------------------------------------------------------|
| REFERENCE DEM                       | Copernicus DEM as reference for co-registration                                                                                                                                                                                                                                                                                                                                                                                                                                                                                                                                                                                                                                                                                                                                                                                                                                                                                                                                                                                                                                                                                                                                                                                                                                                                                                                                                                                                                                                                                                                                                                                                                                                                                                                                                                                                                                              |                                                                                                                                                                                                                                                                                                                                                                                                   |                                                                                                                                           |
| COREGISTRATION                      | Nuth and Kääb (2011) on stable terrain, the tilt between two DEMs was estimated using Pieczonka et al. 2013, small rotational effects and de-ramping were eliminated using Pieczonka and Bolch (2015)                                                                                                                                                                                                                                                                                                                                                                                                                                                                                                                                                                                                                                                                                                                                                                                                                                                                                                                                                                                                                                                                                                                                                                                                                                                                                                                                                                                                                                                                                                                                                                                                                                                                                        |                                                                                                                                                                                                                                                                                                                                                                                                   |                                                                                                                                           |
| BIAS                                | —                                                                                                                                                                                                                                                                                                                                                                                                                                                                                                                                                                                                                                                                                                                                                                                                                                                                                                                                                                                                                                                                                                                                                                                                                                                                                                                                                                                                                                                                                                                                                                                                                                                                                                                                                                                                                                                                                            |                                                                                                                                                                                                                                                                                                                                                                                                   |                                                                                                                                           |
| FILTERING                           | Surface elevation change estimates ( $\Delta H$ ) are inferred probabilistically from the observed elevation changes and the physical knowledge we have of glaciers in general (Guillet and Bolch, 2023)                                                                                                                                                                                                                                                                                                                                                                                                                                                                                                                                                                                                                                                                                                                                                                                                                                                                                                                                                                                                                                                                                                                                                                                                                                                                                                                                                                                                                                                                                                                                                                                                                                                                                     | Absolute elevation differences of $\pm 150$ m were removed. The remaining outliers were removed as proposed by (Gardelle et al. 2013)                                                                                                                                                                                                                                                             | Absolute elevation differences of $\pm 150$ m were removed. The remaining outliers were removed as proposed by Pieczonka and Bolch (2015) |
| VOID-FILLING                        | Void-filling approach follows the methodology proposed by Guillet and Bolch (2023)                                                                                                                                                                                                                                                                                                                                                                                                                                                                                                                                                                                                                                                                                                                                                                                                                                                                                                                                                                                                                                                                                                                                                                                                                                                                                                                                                                                                                                                                                                                                                                                                                                                                                                                                                                                                           | Small data void ( $< 5$ pixels): filled by the mean elevation of the neighbouring pixels ( $4 \times 4$ pixels windows). 2. Larger data gaps: Global mean hypsometric (McNabb et al. 2019) in 100 m elevation bins                                                                                                                                                                                |                                                                                                                                           |
| PENETRATION                         | Penetration correction is here modelled as an elevation-dependent Gaussian probability distribution as proposed by Agarwal et al. (2017)                                                                                                                                                                                                                                                                                                                                                                                                                                                                                                                                                                                                                                                                                                                                                                                                                                                                                                                                                                                                                                                                                                                                                                                                                                                                                                                                                                                                                                                                                                                                                                                                                                                                                                                                                     | No Penetration correction                                                                                                                                                                                                                                                                                                                                                                         |                                                                                                                                           |
| TEMPORAL                            | —                                                                                                                                                                                                                                                                                                                                                                                                                                                                                                                                                                                                                                                                                                                                                                                                                                                                                                                                                                                                                                                                                                                                                                                                                                                                                                                                                                                                                                                                                                                                                                                                                                                                                                                                                                                                                                                                                            |                                                                                                                                                                                                                                                                                                                                                                                                   |                                                                                                                                           |
| UNCERTAINTY ( $\Delta h_{\sigma}$ ) | Outlier culling and uncertainty quantification are unified within a statistically consistent Bayesian framework proposed by Guillet and Bolch (2023). In brief, glacier surface elevation changes are computed as the median of the posterior probability density through Bayes' theorem ( $\text{Posterior} \propto \text{Prior} * \text{Likelihood}$ ). We use a combination of empirical and modelled priors to define a set of elevation-dependent surface elevation change distributions. In practice, this set of admissible values is represented for each elevation change pixel as a Student-T distribution, where the median of the distribution is defined using the datasets of Shean et al. (2020) and Hugonnet et al. (2021). The distribution scale is computed through modelling and depends on the glacier's ELA. This is to allow for weaker priors near the glacier terminus, ensuring that dynamical instabilities such as surges are correctly captured. The likelihood captures data-related uncertainties. Here, we model pixel-wise uncertainties resulting from terrain roughness, obscured and low-contrast surfaces and penetration of radar beams into snow/ice. Each of these components is modelled independently as a marginal probability distribution. The likelihood is then computed by summing over all the possible events, i.e. the sum of all marginal probabilities. The final uncertainty for each pixel is the spread of the posterior distribution. Note, however, that frequentist and Bayesian uncertainties differ in philosophy and cannot be compared directly. If single-value estimates are preferred, then the median of the (pixel-wise) posterior probability density is a satisfactory estimate, and the spread of the (pixel-wise) distribution of medians over the considered region can be compared to other uncertainty estimates. | The uncertainty associated with the volumetric change was calculated as the quadratic sum of the volumetric uncertainties on mean elevation and glacier area change. The uncertainty estimation on the mean elevation change was calculated using the patch (in various sizes) method (Berthier et al., 2016). To constrain the decay of the error with the averaging area (Wagnon et al., 2021). |                                                                                                                                           |

**Table S15. UZH spaceborne results.**

|                          |                                                                                                                                                                                                                                                                                                                                                                                                                                                                                                                                                                                                                                                                                                                                                                                                                                                                                                                                                                                                                                                                                                                                                                          |                                 |                                                                                                                                                                                                                                                                                                                                                                                    |                                 |
|--------------------------|--------------------------------------------------------------------------------------------------------------------------------------------------------------------------------------------------------------------------------------------------------------------------------------------------------------------------------------------------------------------------------------------------------------------------------------------------------------------------------------------------------------------------------------------------------------------------------------------------------------------------------------------------------------------------------------------------------------------------------------------------------------------------------------------------------------------------------------------------------------------------------------------------------------------------------------------------------------------------------------------------------------------------------------------------------------------------------------------------------------------------------------------------------------------------|---------------------------------|------------------------------------------------------------------------------------------------------------------------------------------------------------------------------------------------------------------------------------------------------------------------------------------------------------------------------------------------------------------------------------|---------------------------------|
| GROUP                    | <b>UZH – University of Zurich</b>                                                                                                                                                                                                                                                                                                                                                                                                                                                                                                                                                                                                                                                                                                                                                                                                                                                                                                                                                                                                                                                                                                                                        |                                 |                                                                                                                                                                                                                                                                                                                                                                                    |                                 |
| AUTHORs and AFFILIATIONS | Ines Dussaillant <sup>1</sup> and Michael Zemp <sup>1</sup><br><sup>1</sup> Department of Geography, University of Zurich, Switzerland                                                                                                                                                                                                                                                                                                                                                                                                                                                                                                                                                                                                                                                                                                                                                                                                                                                                                                                                                                                                                                   |                                 |                                                                                                                                                                                                                                                                                                                                                                                    |                                 |
| GLACIER                  | <b>Hintereisferner, Grosser Aletschgletscher</b>                                                                                                                                                                                                                                                                                                                                                                                                                                                                                                                                                                                                                                                                                                                                                                                                                                                                                                                                                                                                                                                                                                                         |                                 |                                                                                                                                                                                                                                                                                                                                                                                    |                                 |
| GROUP-#                  | UZH-1                                                                                                                                                                                                                                                                                                                                                                                                                                                                                                                                                                                                                                                                                                                                                                                                                                                                                                                                                                                                                                                                                                                                                                    | UZH-2                           | UZH-3                                                                                                                                                                                                                                                                                                                                                                              | UZH-4                           |
| QUALITY FLAG             | —                                                                                                                                                                                                                                                                                                                                                                                                                                                                                                                                                                                                                                                                                                                                                                                                                                                                                                                                                                                                                                                                                                                                                                        | —                               | —                                                                                                                                                                                                                                                                                                                                                                                  | —                               |
| SOURCE                   | ASTER                                                                                                                                                                                                                                                                                                                                                                                                                                                                                                                                                                                                                                                                                                                                                                                                                                                                                                                                                                                                                                                                                                                                                                    |                                 |                                                                                                                                                                                                                                                                                                                                                                                    |                                 |
| DEM                      | All Provided DEMs                                                                                                                                                                                                                                                                                                                                                                                                                                                                                                                                                                                                                                                                                                                                                                                                                                                                                                                                                                                                                                                                                                                                                        | Provided DEMs from 2011 to 2018 | All Provided DEMs                                                                                                                                                                                                                                                                                                                                                                  | Provided DEMs from 2010 to 2020 |
| PROCESSING (dh)          | <ul style="list-style-type: none"> <li>• ASTERiX method as in Dussaillant et al. (2019)</li> <li>• Calibration of regional glacier mass balance anomaly (i.e. temporal variability) from Central Europe glaciological sample to produce an annual glacier mass balance time series.</li> </ul>                                                                                                                                                                                                                                                                                                                                                                                                                                                                                                                                                                                                                                                                                                                                                                                                                                                                           |                                 | <ul style="list-style-type: none"> <li>• ASTERiX method as in Dussaillant et al. (2019)</li> <li>• Calibration of Hintereis glacier mass balance anomaly to produce an annual glacier mass balance time series.</li> </ul>                                                                                                                                                         |                                 |
| REFERENCE DEM            | Copernicus DEM                                                                                                                                                                                                                                                                                                                                                                                                                                                                                                                                                                                                                                                                                                                                                                                                                                                                                                                                                                                                                                                                                                                                                           |                                 |                                                                                                                                                                                                                                                                                                                                                                                    |                                 |
| COREGISTRATION           | Horizontal and vertical co-registration from Nuth and Kääb (2011)                                                                                                                                                                                                                                                                                                                                                                                                                                                                                                                                                                                                                                                                                                                                                                                                                                                                                                                                                                                                                                                                                                        |                                 |                                                                                                                                                                                                                                                                                                                                                                                    |                                 |
| BIAS                     | Correction for the across and along track shift inspired by Gardelle et al. (2013) improved by fitting a spline to the residuals along track.                                                                                                                                                                                                                                                                                                                                                                                                                                                                                                                                                                                                                                                                                                                                                                                                                                                                                                                                                                                                                            |                                 |                                                                                                                                                                                                                                                                                                                                                                                    |                                 |
| FILTERING                | The mean dh/dt rate was computed after excluding:<br>Values lying further than 3-NMAD from the median of the elevation band, <ul style="list-style-type: none"> <li>• Pixels on slopes larger than 45°, (c) pixels with uncertainties in the linear fit larger than 2 m yr<sup>-1</sup> (at the 95% confidence level) and (d) absolute dh/dt values larger than 30 m yr<sup>-1</sup></li> </ul>                                                                                                                                                                                                                                                                                                                                                                                                                                                                                                                                                                                                                                                                                                                                                                          |                                 |                                                                                                                                                                                                                                                                                                                                                                                    |                                 |
| VOID-FILLING             | Local hypsometric method using 100 m elevation bands (McNabb et al., 2019).                                                                                                                                                                                                                                                                                                                                                                                                                                                                                                                                                                                                                                                                                                                                                                                                                                                                                                                                                                                                                                                                                              |                                 |                                                                                                                                                                                                                                                                                                                                                                                    |                                 |
| RADAR PENETRATION        | Not applicable                                                                                                                                                                                                                                                                                                                                                                                                                                                                                                                                                                                                                                                                                                                                                                                                                                                                                                                                                                                                                                                                                                                                                           |                                 |                                                                                                                                                                                                                                                                                                                                                                                    |                                 |
| TEMPORAL                 | Aletsch has no glaciological observations. Here, we use the regional annual anomaly, which is obtained as the mean of all individual glacier anomalies of the glaciological observation sample for Central Europe. Anomalies are calculated using the period 2009–2018 as a reference. The regional annual anomaly is then calibrated based on the geodetic estimate obtained for each result. Finally, the experiment targeted period for Aletsch glacier is extracted from the annual time series.                                                                                                                                                                                                                                                                                                                                                                                                                                                                                                                                                                                                                                                                     |                                 | The annual glacier change anomaly comes from the in-situ HEF-glaciological observations. Anomalies are calculated using the period 2009–2018 as a reference. The glacier annual anomaly is then calibrated based on the geodetic estimate obtained from each result. Finally, the experiment targeted period for Hintereisferner glacier is extracted from the annual time series. |                                 |
| UNCERTAINTY (dh_sigma)   | Volume change uncertainties were assessed as random errors coming from two main sources, assumed to be independent of one another: <ul style="list-style-type: none"> <li>• The uncertainty in the rate of elevation change (multiplied by a factor of 5 over data voids).</li> <li>• The uncertainty in the glacierised area. Errors are combined according to Rolstad et al. (2009) and Fischer et al. (2015).</li> </ul> The calibrated series uncertainty results as the combination of two independent errors: <ul style="list-style-type: none"> <li>• The uncertainty related to the multi-annual geodetic mass change rate (obtained from the main results).</li> <li>• The glacier/regional anomaly uncertainty. The uncertainty of the regional anomaly is calculated as the combination of the mean uncertainty from the glaciological sample and the variability of the individual glacier anomalies at a 95% confidence interval.</li> </ul> All these errors are combined according to the law of random error propagation. The methodology is inspired by previous work from Zemp et al. (2019, 2020) and further developed by Dussaillant et al. (2023). |                                 |                                                                                                                                                                                                                                                                                                                                                                                    |                                 |

**Table S16.** Experiment and validation results for Hintereis (HEF) for the target period from 2010 to 2019.

For each group and run, a summary of data and workflow (0: no; 1: yes) is provided together with survey dates (DD.MM.YYYY) and corresponding elevation changes (dh) in metre.

T0 refers to survey periods without temporal corrections; T1 refers to survey periods with temporal corrections but different from validation period; T2 refers to the validation period.

Final results of all runs are given in dh\_T2\_final, including temporal corrections to the validation period, if needed. Uncertainties are reported in metre and at 95% confidence levels. Results reported as low confidence have a quality flag of 0

| GLACIER | GROUP | RUN | SOURCE   | DEM_COUNT | PROVIDED | PROCESSED | PAIR | MOSAIC | TIMESERIES | CO-REGISTRATION | BIAS | NOISE_FILTERING | VOID_FILLING | PENETRATION | TEMPORAL | T0_START   | T0_END     | T1_START   | T1_END     | T2_START   | T2_END     | dh_T0   | dh_T1   | dh_T2_final | dh_UNCERTAINTY | QUALITY_FLAG |
|---------|-------|-----|----------|-----------|----------|-----------|------|--------|------------|-----------------|------|-----------------|--------------|-------------|----------|------------|------------|------------|------------|------------|------------|---------|---------|-------------|----------------|--------------|
| HEF     | LMI   | 1   | ASTER    | 189       | 1        | 0         | 0    | 0      | 1          | 1               | 0    | 1               | 1            | 0           | 1        |            |            | 02.10.2010 | 17.09.2019 |            |            | -10.711 | -10.729 | -10.729     | 0.27           | 1            |
| HEF     | LEG   | 1   | ASTER    | 2         | 1        | 0         | 1    | 0      | 0          | 1               | 1    | 1               | 1            | 0           | 0        | 03.10.2009 | 29.09.2019 | 03.10.2010 | 29.09.2019 |            |            | -12.8   | -12.111 | -12.066     | 3.46           | 1            |
| HEF     | UGA   | 1   | ASTER    | 2         | 1        | 0         | 1    | 0      | 0          | 1               | 1    | 1               | 1            | 0           | 0        | 03.10.2009 | 15.09.2020 |            |            |            |            | -11.212 | -9.26   | -9.26       | 1.578          | 1            |
| HEF     | UGA   | 2   | ASTER    | 22        | 1        | 0         | 0    | 1      | 0          | 1               | 1    | 1               | 1            | 0           | 0        | 26.08.2010 | 20.09.2019 |            |            |            |            | -8.998  | -8.534  | -8.534      | 1.265          | 1            |
| HEF     | UGA   | 3   | ASTER    | 61        | 1        | 0         | 0    | 0      | 1          | 1               | 1    | 1               | 1            | 0           | 1        |            |            |            |            | 08.10.2010 | 21.09.2019 |         | -12.556 | -12.556     | 1.65           | 1            |
| HEF     | UGA   | 4   | ASTER    | 189       | 1        | 0         | 0    | 0      | 1          | 1               | 1    | 1               | 1            | 0           | 1        |            |            |            |            | 08.10.2010 | 21.09.2019 |         | -13.261 | -13.261     | 1.659          | 1            |
| HEF     | UZH   | 1   | ASTER    | 20        | 1        | 0         | 0    | 0      | 1          | 1               | 0    | 1               | 1            | 0           | 0        | 19.11.2001 | 22.04.2021 | 01.10.2010 | 30.09.2019 |            |            | -27.21  | -13.042 | -12.99      | 0.613          | 1            |
| HEF     | UZH   | 2   | ASTER    | 14        | 1        | 0         | 0    | 0      | 1          | 1               | 0    | 1               | 1            | 0           | 0        | 27.03.2012 | 23.09.2019 | 01.10.2010 | 30.09.2019 |            |            | -12.2   | -13.984 | -13.932     | 0.747          | 1            |
| HEF     | USG   | 1   | ASTER    | 2         | 1        | 0         | 1    | 0      | 0          | 1               | 0    | 0               | 1            | 0           | 0        | 27.08.2010 | 21.09.2019 |            |            |            |            | -9.22   | -8.771  | -8.771      | 9.192          | 1            |
| HEF     | ETH   | 1   | ASTER    |           | 0        | 1         | 0    | 0      | 1          | 1               | 1    | 1               | 1            | 0           | 2        |            |            | 01.10.2010 | 01.10.2019 |            |            |         | -12.438 | -12.386     | 4.639          | 1            |
| HEF     | DLR   | 1   | TDX      | 2         | 0        | 1         | 1    | 0      | 0          | 1               | 1    | 1               | 1            | 0           | 1        | 24.09.2011 | 11.09.2020 |            |            | 08.10.2010 | 21.09.2019 | -5.14   | -5.13   | -5.13       | 2.539          | 0            |
| HEF     | DLR   | 2   | TDX      | 2         | 0        | 1         | 1    | 0      | 0          | 1               | 1    | 1               | 1            | 0           | 1        | 24.09.2011 | 09.02.2019 |            |            | 08.10.2010 | 21.09.2019 | -11.29  | -13.7   | -13.7       | 1.07           | 1            |
| HEF     | DLR   | 3   | TDX      | 2         | 0        | 1         | 1    | 0      | 0          | 1               | 1    | 1               | 1            | 0           | 1        | 24.09.2011 | 09.02.2019 |            |            | 08.10.2010 | 21.09.2019 | -8.74   | -10.61  | -10.61      | 0.816          | 1            |
| HEF     | DLR   | 4   | TDX      | 2         | 0        | 1         | 1    | 0      | 0          | 1               | 1    | 1               | 1            | 0           | 1        | 24.09.2011 | 11.09.2020 |            |            | 08.10.2010 | 21.09.2019 | -4.06   | -4.058  | -4.058      | 1.042          | 0            |
| HEF     | DLR   | 5   | TDX      | 2         | 0        | 1         | 1    | 0      | 0          | 1               | 1    | 1               | 1            | 0           | 1        | 24.09.2011 | 09.02.2019 |            |            | 08.10.2010 | 21.09.2019 | -8.19   | -9.938  | -9.938      | 1.014          | 1            |
| HEF     | DLR   | 6   | TDX      | 2         | 1        | 0         | 1    | 0      | 0          | 1               | 1    | 1               | 1            | 0           | 1        | 24.09.2011 | 09.02.2019 |            |            | 08.10.2010 | 21.09.2019 | -8.78   | -10.657 | -10.657     | 1.051          | 1            |
| HEF     | DLR   | 7   | TDX      | 2         | 0        | 1         | 1    | 0      | 0          | 1               | 1    | 1               | 1            | 0           | 1        | 24.09.2011 | 09.02.2019 |            |            | 08.10.2010 | 21.09.2019 | -8.44   | -10.246 | -10.246     | 0.859          | 1            |
| HEF     | UIO   | 1   | ASTER    | 2         | 1        | 0         | 1    | 0      | 0          | 1               | 0    | 1               | 1            | 0           | 0        | 03.10.2009 | 29.09.2019 | 01.10.2010 | 30.09.2019 |            |            | -11.956 | -11.026 | -10.974     | 3.593          | 1            |
| HEF     | UIO   | 2   | ASTER    | 2         | 1        | 0         | 1    | 0      | 0          | 1               | 0    | 1               | 1            | 0           | 0        | 03.10.2009 | 29.09.2019 | 01.10.2010 | 30.09.2019 |            |            | -12.086 | -11.16  | -11.108     | 3.593          | 1            |
| HEF     | UIO   | 3   | ASTER    | 75        | 1        | 0         | 0    | 0      | 1          | 1               | 0    | 1               | 0            | 0           | 1        |            |            |            |            | 08.10.2010 | 21.09.2019 |         | -10.035 | -10.035     | 3.43           | 1            |
| HEF     | UIO   | 4   | ASTER    | 75        | 1        | 0         | 0    | 0      | 1          | 1               | 0    | 1               | 0            | 0           | 1        |            |            |            |            | 08.10.2010 | 21.09.2019 |         | -11.41  | -11.41      | 2.215          | 1            |
| HEF     | UIO   | 5   | TDX      | 2         | 1        | 0         | 1    | 0      | 0          | 1               | 0    | 1               | 1            | 0           | 0        | 24.09.2011 | 11.09.2020 |            |            |            |            | -3.905  | -4.409  | 5.926       | 0              |              |
| HEF     | UIO   | 6   | TDX      | 2         | 1        | 0         | 1    | 0      | 0          | 1               | 0    | 1               | 1            | 0           | 0        | 16.02.2012 | 06.02.2019 | 01.10.2010 | 30.09.2019 |            |            | -6.556  | -9.026  | -8.974      | 1.897          | 1            |
| HEF     | FAU   | 1   | ASTER    |           | 1        | 0         | 0    | 1      | 0          | 1               | 1    | 1               | 1            | 0           | 0        | 18.08.2010 | 20.09.2019 |            |            |            |            | -7.791  | -7.141  | -7.141      | 1.073          | 1            |
| HEF     | FAU   | 2   | TDX      |           | 1        | 0         | 0    | 1      | 0          | 1               | 1    | 1               | 1            | 0           | 0        | 04.10.2011 | 21.10.2019 |            |            |            |            | -6.974  | -8.173  | -8.173      | 1.429          | 1            |
| HEF     | BAW   | 1   | TDX      | 2         | 1        | 0         | 1    | 0      | 0          | 1               | 1    | 1               | 1            | 0           | 1        | 16.02.2012 | 06.02.2019 |            |            | 08.10.2010 | 21.09.2019 | -7.777  | -9.978  | -9.978      | 0.777          | 1            |
| HEF     | VAL   | 1   | airborne | 2         | 1        | 1         | 1    | 0      | 0          | 1               | 0    | 0               | 0            | 0           | 0        |            |            |            |            | 08.10.2010 | 21.09.2019 |         | -10.614 | -10.614     | 0.255          | 1            |



**Table S17.** Experiment and validation results for Aletsch (ALE) for the target period from 2011 to 2017.

For each group and run, a summary of data and workflow (0: no; 1: yes) is provided together with survey dates (DD.MM.YYYY) and corresponding elevation changes (dh) in metre.

T0 refers to survey periods without temporal corrections; T1 refers to survey periods with temporal corrections but different from validation period; T2 refers to the validation period.

Final results of all runs are given in dh\_T2\_final, including temporal corrections to the validation period, if needed. Uncertainties are reported in metre and at 95% confidence levels. Results reported as low confidence have a quality flag of 0

| GLACIER | GROUP | RUN | SOURCE    | DEM_COUNT | PROVIDED | PROCESSED | PAIR | MOSAIC | TIMESERIES | CO-REGISTRATION | BIAS | NOISE_FILTERING | VOID_FILLING | PENETRATION | TEMPORAL | T0_START   | T0_END     | T1_START   | T1_END     | T2_START   | T2_END     | dh_T0 | dh_T1   | dh_T2  | dh_T2_final | dh_UNCERTAINTY | QUALITY_FLAG |   |
|---------|-------|-----|-----------|-----------|----------|-----------|------|--------|------------|-----------------|------|-----------------|--------------|-------------|----------|------------|------------|------------|------------|------------|------------|-------|---------|--------|-------------|----------------|--------------|---|
| ALE     | LMI   | 1   | ASTER     | 168       | 1        | 0         | 0    | 0      | 1          | 1               | 0    | 1               | 1            | 0           | 1        |            |            | 16.09.2011 | 16.09.2017 |            |            |       | -7.423  |        | -7.535      | 0.18           | 1            |   |
| ALE     | LEG   | 1   | ASTER     | 2         | 1        | 0         | 1    | 0      | 0          | 1               | 1    | 1               | 1            | 0           | 1        | 07.09.2012 | 05.09.2017 | 07.09.2011 | 05.09.2017 |            |            |       | -6.9    | -9.019 | -9.219      | 2.12           | 1            |   |
| ALE     | UGA   | 1   | ASTER     | 2         | 1        | 0         | 1    | 0      | 0          | 1               | 1    | 1               | 1            | 0           | 0        | 23.09.2012 | 02.09.2016 |            |            |            |            |       | -2.605  |        | -6.362      | 0.455          | 1            |   |
| ALE     | UGA   | 2   | ASTER     | 18        | 1        | 0         | 0    | 1      | 0          | 1               | 1    | 1               | 1            | 0           | 0        | 22.08.2012 | 25.09.2016 |            |            |            |            |       | -6.127  |        | -8.914      | 0.404          | 1            |   |
| ALE     | UGA   | 3   | ASTER     | 39        | 1        | 0         | 0    | 0      | 1          | 1               | 1    | 1               | 1            | 0           | 2        |            |            |            |            | 13.09.2011 | 21.09.2017 |       |         | -9.374 | -9.374      | 0.609          | 1            |   |
| ALE     | UGA   | 4   | ASTER     | 168       | 1        | 0         | 0    | 0      | 1          | 1               | 1    | 1               | 1            | 0           | 2        |            |            |            |            | 13.09.2011 | 21.09.2017 |       |         | -8.061 | -8.061      | 0.484          | 1            |   |
| ALE     | UZH   | 1   | ASTER     | 12        | 1        | 0         | 0    | 0      | 1          | 1               | 0    | 1               | 1            | 0           | 1        | 30.07.2001 | 22.04.2020 | 01.10.2011 | 30.09.2017 |            |            |       | -24.697 | -9.275 | -9.363      | 2.466          | 1            |   |
| ALE     | UZH   | 2   | ASTER     | 6         | 1        | 0         | 0    | 0      | 1          | 1               | 0    | 1               | 1            | 0           | 1        | 01.06.2012 | 16.09.2017 | 01.10.2011 | 30.09.2017 |            |            |       | -6.37   | -7.6   | -7.688      | 2.54           | 1            |   |
| ALE     | USG   | 1   | ASTER/TDX | 2         | 1        | 0         | 1    | 0      | 0          | 1               | 0    | 0               | 1            | 0           | 0        | 23.09.2011 | 22.09.2017 |            |            |            |            |       | -2.59   |        | -2.694      | 15.576         | 0            |   |
| ALE     | ETH   | 1   | ASTER     |           | 0        | 1         | 0    | 0      | 1          | 1               | 1    | 1               | 1            | 0           | 2        |            |            | 01.09.2011 | 01.09.2017 |            |            |       |         | -8.533 | -8.711      | 3.233          | 1            |   |
| ALE     | DLR   | 1   | TDX       | 4         | 0        | 1         | 0    | 1      | 0          | 1               | 1    | 1               | 1            | 0           | 1        | 21.08.2011 | 03.01.2018 |            |            | 13.09.2011 | 21.09.2017 |       |         | -12.88 | -12.173     | -12.173        | 0.37         | 0 |
| ALE     | DLR   | 2   | TDX       | 4         | 0        | 1         | 0    | 1      | 0          | 1               | 1    | 1               | 1            | 0           | 1        | 21.08.2011 | 03.01.2018 |            |            | 13.09.2011 | 21.09.2017 |       |         | -12.14 | -11.479     | -11.479        | 0.417        | 0 |
| ALE     | DLR   | 3   | TDX       | 4         | 0        | 1         | 0    | 1      | 0          | 1               | 1    | 1               | 1            | 0           | 1        | 21.08.2011 | 03.01.2018 |            |            | 13.09.2011 | 21.09.2017 |       |         | -11.5  | -10.868     | -10.868        | 0.301        | 0 |
| ALE     | DLR   | 4   | TDX       | 4         | 0        | 1         | 0    | 1      | 0          | 1               | 1    | 1               | 1            | 0           | 1        | 21.08.2011 | 03.01.2018 |            |            | 13.09.2011 | 21.09.2017 |       |         | -10.83 | -10.239     | -10.239        | 0.396        | 0 |
| ALE     | DLR   | 5   | TDX       | 4         | 1        | 0         | 0    | 1      | 0          | 1               | 1    | 1               | 1            | 0           | 1        | 21.08.2011 | 03.01.2018 |            |            | 13.09.2011 | 21.09.2017 |       |         | -11.83 | -11.186     | -11.186        | 0.134        | 0 |
| ALE     | DLR   | 6   | TDX       | 2         | 1        | 0         | 1    | 0      | 0          | 1               | 1    | 1               | 1            | 0           | 1        | 21.03.2013 | 01.01.2019 |            |            | 13.09.2011 | 21.09.2017 |       |         | -7.25  | -7.547      | -7.547         | 0.117        | 1 |
| ALE     | FAU   | 1   | ASTER     |           | 1        | 0         | 0    | 1      | 0          | 1               | 1    | 1               | 1            | 0           | 0        | 21.03.2011 | 16.09.2018 |            |            |            |            |       | -10.993 |        | -7.683      | 0.679          | 1            |   |
| ALE     | FAU   | 2   | TDX       |           | 1        | 0         | 0    | 1      | 0          | 1               | 1    | 1               | 1            | 0           | 0        | 19.01.2012 | 12.12.2017 |            |            |            |            |       | -8.854  |        | -8.624      | 0.547          | 1            |   |
| ALE     | BAW   | 1   | TDX       | 2         | 1        | 0         | 1    | 0      | 0          | 1               | 1    | 1               | 1            | 0           | 1        | 21.03.2013 | 01.01.2019 |            |            | 13.09.2011 | 21.09.2017 |       |         | -6.987 | -7.276      | -7.276         | 0.945        | 1 |
| ALE     | VAL   | 1   | airborne  | 2         | 1        | 1         | 1    | 0      | 0          | 0               | 0    | 0               | 0            | 0           | 0        |            |            |            |            | 13.09.2011 | 21.09.2017 |       |         | -6.88  | -6.88       | 0.921          | 1            |   |

**Table S18.** Experiment and validation results for Vestisen (VES) for the target period from 2008 to 2020.

For each group and run, a summary of data and workflow (0: no; 1: yes) is provided together with survey dates (DD.MM.YYYY) and corresponding elevation changes (dh) in metre

T0 refers to survey periods without temporal corrections; T1 refers to survey periods with temporal corrections but different from validation period; T2 refers to the validation period

Final results of all runs are given in dh\_T2\_final, including temporal corrections to the validation period, if needed. Uncertainties are reported in metre and at 95% confidence levels. Results reported as low confidence have a quality flag of 0

| GLACIER | GROUP | RUN | SOURCE   | DEM_COUNT | PROVIDED | PROCESSED | PAIR | MOSAIC | TIMESERIES | CO-REGISTRATION | BIAS | NOISE_FILTERING | VOID_FILLING | PENETRATION | TEMPORAL | T0_START   | T0_END     | T1_START | T1_END | T2_START   | T2_END     | dh_T0 | dh_T1 | dh_T2 | dh_T2_final | dh_UNCERTAINTY | QUALITY_FLAG |   |
|---------|-------|-----|----------|-----------|----------|-----------|------|--------|------------|-----------------|------|-----------------|--------------|-------------|----------|------------|------------|----------|--------|------------|------------|-------|-------|-------|-------------|----------------|--------------|---|
| VES     | UGA   | 2   | ASTER    | 2         | 1        | 0         | 0    | 1      | 0          | 1               | 1    | 1               | 1            | 0           | 0        | 08.08.2009 | 25.08.2021 |          |        |            |            |       |       |       | -18.3       | -16.818        | 3.53         | 0 |
| VES     | UGA   | 3   | ASTER    | 30        | 1        | 0         | 0    | 0      | 1          | 1               | 1    | 1               | 1            | 0           | 2        |            |            |          |        | 02.09.2008 | 10.08.2020 |       |       |       | 14.58       | 14.58          | 3.06         | 0 |
| VES     | UGA   | 4   | ASTER    | 79        | 1        | 0         | 0    | 0      | 1          | 1               | 1    | 1               | 1            | 0           | 2        |            |            |          |        | 02.09.2008 | 10.08.2020 |       |       |       | -9.65       | -9.65          | 1.06         | 1 |
| VES     | USG   | 1   | TDX      | 2         | 1        | 0         | 1    | 0      | 0          | 1               | 0    | 0               | 1            | 0           | 0        | 20.03.2011 | 01.01.2021 |          |        |            |            |       |       |       | -1.43       | -0.776         | 2.89         | 1 |
| VES     | ETH   | 1   | ASTER    | 0         | 1        | 0         | 0    | 0      | 1          | 1               | 1    | 1               | 1            | 0           | 0        | 01.09.2007 | 01.08.2019 |          |        |            |            |       |       |       | -5.54       | -4.756         | 4.13         | 1 |
| VES     | UIO   | 1   | ASTER    | 2         | 1        | 0         | 1    | 0      | 0          | 1               | 0    | 1               | 1            | 0           | 0        | 11.08.2006 | 28.07.2019 |          |        |            |            |       |       |       | 0.24        | 1.366          | 3.86         | 0 |
| VES     | UIO   | 2   | ASTER    | 2         | 1        | 0         | 1    | 0      | 0          | 1               | 0    | 1               | 1            | 0           | 0        | 11.08.2006 | 28.07.2019 |          |        |            |            |       |       |       | -1.12       | 0.006          | 3.86         | 0 |
| VES     | UIO   | 3   | ASTER    | 2         | 1        | 0         | 1    | 0      | 0          | 1               | 0    | 1               | 1            | 0           | 0        | 11.08.2006 | 28.07.2019 |          |        |            |            |       |       |       | -0.42       | 0.706          | 5.35         | 0 |
| VES     | UIO   | 4   | ASTER    | 82        | 1        | 0         | 0    | 0      | 1          | 1               | 0    | 1               | 0            | 0           | 2        |            |            |          |        | 02.09.2008 | 10.08.2020 |       |       |       | -2.71       | -2.71          | 5.88         | 0 |
| VES     | UIO   | 5   | ASTER    | 82        | 1        | 0         | 0    | 0      | 1          | 1               | 0    | 1               | 0            | 0           | 2        |            |            |          |        | 02.09.2008 | 10.08.2020 |       |       |       | -2.9        | -2.9           | 4.14         | 1 |
| VES     | UIO   | 6   | ASTER    | 2         | 0        | 1         | 1    | 0      | 0          | 1               | 1    | 1               | 1            | 0           | 0        | 11.08.2006 | 28.07.2019 |          |        |            |            |       |       |       | -5.01       | -3.884         | 4.16         | 1 |
| VES     | UIO   | 7   | ASTER    | 2         | 0        | 1         | 1    | 0      | 0          | 1               | 1    | 1               | 1            | 0           | 0        | 11.08.2006 | 28.07.2019 |          |        |            |            |       |       |       | -3.47       | -2.344         | 3.86         | 1 |
| VES     | FAU   | 1   | ASTER    | 1         | 1        | 0         | 0    | 1      | 0          | 1               | 1    | 1               | 1            | 0           | 0        | 01.06.2007 | 26.08.2021 |          |        |            |            |       |       |       | 18.56       | 22.013         | 1.2          | 0 |
| VES     | FAU   | 2   | TDX      | 1         | 1        | 0         | 0    | 1      | 0          | 1               | 1    | 1               | 1            | 0           | 0        | 20.03.2011 | 01.01.2021 |          |        |            |            |       |       |       | -1.82       | -1.166         | 0.19         | 1 |
| VES     | VAL   | 1   | airborne | 2         | 1        | 1         | 1    | 0      | 0          | 1               | 0    | 0               | 0            | 0           | 0        |            |            |          |        | 02.09.2008 | 10.08.2020 |       |       |       | -4.26       | -4.26          | 0.18         | 1 |

**Table S19.** Experiment results for Baltoro (BAL) for the target period from 2000 to 2012.

For each group and run, a summary of data and workflow (0: no; 1: yes) is provided together with survey dates (DD.MM.YYYY) and corresponding elevation changes (dh) in metre. Uncertainties are reported in metre and at 95% confidence levels. Results reported as low confidence as well as sensitivity runs (e.g., NO-CO: no co-registration) have a quality flag of 0. Start and end dates of the target period (TAR) are given in the last row.

| GLACIER | GROUP | RUN | RUN_NAME | SOURCE      | DEM_COUNT | PROVIDED | PROCESSED | PAIR | MOSAIC | TIMESERIES | CO-REGISTRATION | BIAS | NOISE_FILTERING | VOID_FILLING | PENETRATION | TEMPORAL | START_DATE | END_DATE   | dh      | dh_UNCERTAINTY | QUALITY_FLAG |
|---------|-------|-----|----------|-------------|-----------|----------|-----------|------|--------|------------|-----------------|------|-----------------|--------------|-------------|----------|------------|------------|---------|----------------|--------------|
| BAL     | LEG   | 1   | CTL      | ASTER/ASTER | 4         | 1        | 0         | 0    | 1      | 0          | 1               | 1    | 1               | 1            | 0           | 0        | 01.02.2000 | 01.10.2012 | 2.647   | 7.77           | 1            |
| BAL     | LEG   | 1   | NO-BIAS  | ASTER/ASTER | 4         | 1        | 0         | 0    | 1      | 0          | 1               | 0    | 1               | 1            | 0           | 0        | 01.02.2000 | 01.10.2012 | 1.489   | 11.13          | 0            |
| BAL     | LEG   | 1   | NO-CO    | ASTER/ASTER | 4         | 1        | 0         | 0    | 1      | 0          | 0               | 1    | 1               | 1            | 0           | 0        | 01.02.2000 | 01.10.2012 | 1.017   | 23.72          | 0            |
| BAL     | UST   | 1   | CTL      | SRTM/ASTER  | 2         | 1        | 0         | 1    | 0      | 0          | 1               | 1    | 1               | 1            | 1           | 0        | 16.02.2000 | 20.08.2012 | -1.79   | 3.83           | 1            |
| BAL     | UST   | 1   | NO-CO    | SRTM/ASTER  | 2         | 1        | 0         | 1    | 0      | 0          | 0               | 0    | 1               | 1            | 1           | 0        | 16.02.2000 | 20.08.2012 | -2.65   | 3.85           | 0            |
| BAL     | UST   | 1   | NO-GAP   | SRTM/ASTER  | 2         | 1        | 0         | 1    | 0      | 0          | 1               | 1    | 0               | 0            | 1           | 0        | 16.02.2000 | 20.08.2012 | -0.727  | 4.1            | 0            |
| BAL     | UST   | 1   | NO-PEN   | SRTM/ASTER  | 2         | 1        | 0         | 1    | 0      | 0          | 1               | 1    | 1               | 1            | 0           | 0        | 16.02.2000 | 20.08.2012 | -0.6    | 3.5            | 0            |
| BAL     | UGA   | 1   | CTL      | ASTER/ASTER | 2         | 1        | 0         | 1    | 0      | 0          | 1               | 1    | 1               | 1            | 0           | 0        | 11.09.2000 | 10.10.2013 | -2.796  | 0.579          | 0            |
| BAL     | UGA   | 2   | CTL      | ASTER/ASTER | 5         | 1        | 0         | 0    | 1      | 0          | 1               | 1    | 1               | 1            | 0           | 0        | 11.09.2000 | 28.09.2012 | -1.784  | 0.511          | 0            |
| BAL     | UGA   | 3   | CTL      | ASTER/ASTER | 79        | 1        | 0         | 0    | 0      | 1          | 1               | 1    | 1               | 1            | 0           | 1        | 01.02.2000 | 01.10.2011 | -2.431  | 0.224          | 1            |
| BAL     | UGA   | 4   | CTL      | ASTER/ASTER | 119       | 1        | 0         | 0    | 0      | 1          | 1               | 1    | 1               | 1            | 0           | 1        | 01.02.2000 | 01.10.2011 | -0.309  | 0.059          | 1            |
| BAL     | UGA   | 1   | NO-BIAS  | ASTER/ASTER | 2         | 1        | 0         | 1    | 0      | 0          | 1               | 0    | 1               | 1            | 0           | 0        | 11.09.2000 | 10.10.2013 | -3.182  | 0.625          | 0            |
| BAL     | UGA   | 2   | NO-BIAS  | ASTER/ASTER | 5         | 1        | 0         | 0    | 1      | 0          | 1               | 0    | 1               | 1            | 0           | 0        | 11.09.2000 | 28.09.2012 | -2.926  | 0.555          | 0            |
| BAL     | UGA   | 3   | NO-BIAS  | ASTER/ASTER | 79        | 1        | 0         | 0    | 0      | 1          | 1               | 0    | 1               | 1            | 0           | 1        | 01.02.2000 | 01.10.2011 | -0.914  | 0.151          | 0            |
| BAL     | UGA   | 1   | NO-CO    | ASTER/ASTER | 2         | 1        | 0         | 1    | 0      | 0          | 0               | 1    | 1               | 1            | 0           | 0        | 11.09.2000 | 10.10.2013 | -17.669 | 1.821          | 0            |
| BAL     | UGA   | 2   | NO-CO    | ASTER/ASTER | 5         | 1        | 0         | 0    | 1      | 0          | 0               | 1    | 1               | 1            | 0           | 0        | 11.09.2000 | 28.09.2012 | -12.905 | 1.533          | 0            |
| BAL     | UGA   | 3   | NO-CO    | ASTER/ASTER | 79        | 1        | 0         | 0    | 0      | 1          | 0               | 1    | 1               | 1            | 0           | 1        | 01.02.2000 | 01.10.2011 | -19.585 | 1.513          | 0            |
| BAL     | UGA   | 1   | NO-FIL   | ASTER/ASTER | 2         | 1        | 0         | 1    | 0      | 0          | 0               | 1    | 1               | 1            | 0           | 0        | 11.09.2000 | 10.10.2013 | -2.978  | 0.584          | 0            |
| BAL     | UGA   | 2   | NO-FIL   | ASTER/ASTER | 5         | 1        | 0         | 0    | 1      | 0          | 1               | 1    | 0               | 1            | 0           | 0        | 11.09.2000 | 28.09.2012 | -1.102  | 0.5            | 0            |
| BAL     | UGA   | 3   | NO-FIL   | ASTER/ASTER | 79        | 1        | 0         | 0    | 0      | 1          | 1               | 1    | 0               | 1            | 0           | 1        | 01.02.2000 | 01.10.2011 | -2.399  | 0.222          | 0            |
| BAL     | UGA   | 1   | NO-GAP   | ASTER/ASTER | 2         | 1        | 0         | 1    | 0      | 0          | 0               | 1    | 1               | 0            | 0           | 0        | 11.09.2000 | 10.10.2013 | -5.474  | 0.681          | 0            |
| BAL     | UGA   | 2   | NO-GAP   | ASTER/ASTER | 5         | 1        | 0         | 0    | 1      | 0          | 1               | 1    | 1               | 0            | 0           | 0        | 11.09.2000 | 28.09.2012 | -4.373  | 0.595          | 0            |
| BAL     | UGA   | 3   | NO-GAP   | ASTER/ASTER | 79        | 1        | 0         | 0    | 0      | 1          | 1               | 1    | 1               | 0            | 0           | 1        | 01.02.2000 | 01.10.2011 | -2.676  | 0.24           | 0            |
| BAL     | USG   | 1   | CTL      | ASTER/ASTER | 2         | 1        | 0         | 1    | 0      | 0          | 0               | 1    | 0               | 0            | 0           | 0        | 28.12.2001 | 06.05.2011 | 5.229   | 15.9           | 1            |
| BAL     | USG   | 1   | NO-CO    | ASTER/ASTER | 2         | 1        | 0         | 1    | 0      | 0          | 0               | 0    | 0               | 1            | 0           | 0        | 28.12.2001 | 06.05.2011 | 2.12    | 15.6           | 0            |
| BAL     | USG   | 1   | NO-GAP   | ASTER/ASTER | 2         | 1        | 0         | 1    | 0      | 0          | 1               | 0    | 0               | 0            | 0           | 0        | 28.12.2001 | 06.05.2011 | 3.42    | 11.6           | 0            |
| BAL     | ETH   | 1   | CTL      | ASTER/ASTER |           | 0        | 1         | 0    | 0      | 1          | 1               | 1    | 1               | 1            | 0           | 1        | 01.02.2000 | 01.10.2012 | -1.055  | 3.032          | 1            |
| BAL     | GAC   | 1   | CTL      | SRTM/TDX    | 4         | 1        | 0         | 0    | 1      | 0          | 1               | 1    | 1               | 1            | 1           | 0        | 16.02.2000 | 20.02.2012 | 0.67    | 7.2            | 1            |
| BAL     | GAC   | 1   | NO-BIAS  | SRTM/TDX    | 4         | 1        | 0         | 0    | 1      | 0          | 1               | 0    | 1               | 1            | 1           | 0        | 16.02.2000 | 20.02.2012 | -0.07   | 6.95           | 0            |
| BAL     | GAC   | 1   | NO-CO    | SRTM/TDX    | 4         | 1        | 0         | 0    | 1      | 0          | 0               | 1    | 1               | 1            | 1           | 0        | 16.02.2000 | 20.02.2012 | -3.92   | 7.94           | 0            |
| BAL     | GAC   | 1   | NO-FIL   | SRTM/TDX    | 4         | 1        | 0         | 0    | 1      | 0          | 1               | 1    | 0               | 1            | 1           | 0        | 16.02.2000 | 20.02.2012 | 0.94    | 9.74           | 0            |
| BAL     | GAC   | 1   | NO-GAP   | SRTM/TDX    | 4         | 1        | 0         | 0    | 1      | 0          | 1               | 1    | 0               | 0            | 1           | 0        | 16.02.2000 | 20.02.2012 | -1.23   | 7.51           | 0            |
| BAL     | GAC   | 1   | NO-PEN   | SRTM/TDX    | 4         | 1        | 0         | 0    | 1      | 0          | 1               | 1    | 1               | 1            | 0           | 0        | 16.02.2000 | 20.02.2012 | 2.72    | 7.72           | 0            |
| BAL     | FAU   | 1   | CTL      | ASTER/ASTER | 22        | 1        | 0         | 0    | 1      | 0          | 1               | 1    | 1               | 1            | 0           | 0        | 19.07.2000 | 28.03.2011 | -0.521  | 0.153          | 1            |
| BAL     | FAU   | 2   | CTL      | SRTM/TDX    | 4         | 1        | 0         | 0    | 1      | 0          | 1               | 1    | 1               | 1            | 0           | 0        | 16.02.2000 | 09.02.2012 | -1.202  | 0.066          | 1            |
| BAL     | FAU   | 2   | NO-CO    | SRTM/TDX    | 4         | 1        | 0         | 0    | 1      | 0          | 0               | 1    | 1               | 1            | 0           | 0        | 16.02.2000 | 09.02.2012 | -13.014 | 0.517          | 0            |
| BAL     | FAU   | 2   | NO-FIL   | SRTM/TDX    | 4         | 1        | 0         | 0    | 1      | 0          | 1               | 1    | 0               | 1            | 0           | 0        | 16.02.2000 | 09.02.2012 | -1.142  | 0.066          | 0            |
| BAL     | FAU   | 2   | NO-GAP   | SRTM/TDX    | 4         | 1        | 0         | 0    | 1      | 0          | 1               | 1    | 1               | 0            | 0           | 0        | 16.02.2000 | 09.02.2012 | -1.655  | 0.066          | 0            |
| BAL     | TAR   | 1   |          |             |           |          |           |      |        |            |                 |      |                 |              |             |          | 01.02.2000 | 01.10.2012 |         |                |              |

**Table S20.** Experiment results for Baltoro (BAL) for the target period from 2012 to 2019.

For each group and run, a summary of data and workflow (0: no; 1: yes) is provided together with survey dates (DD.MM.YYYY) and corresponding elevation changes (dh) in metre. Uncertainties are reported in metre and at 95% confidence levels. Results reported as low confidence as well as sensitivity runs (e.g., NO-CO: no co-registration) have a quality flag of 0. Start and end dates of the target period (TAR) are given in the last row.

| GLACIER | GROUP | RUN | RUN_NAME | SOURCE      | DEM_COUNT | PROVIDED | PROCESSED | PAIR | MOSAIC | TIMESERIES | CO-REGISTRATION | BIAS | NOISE_FILTERING | VOID_FILLING | PENETRATION | TEMPORAL | START_DATE | END_DATE   | dh     | dh_UNCERTAINTY | QUALITY_FLAG |
|---------|-------|-----|----------|-------------|-----------|----------|-----------|------|--------|------------|-----------------|------|-----------------|--------------|-------------|----------|------------|------------|--------|----------------|--------------|
| BAL     | LEG   | 1   | CTL      | ASTER/ASTER | 3         | 1        | 0         | 0    | 1      | 0          | 1               | 1    | 1               | 1            | 0           | 0        | 01.10.2012 | 01.10.2019 | -1.889 | 4.02           | 1            |
| BAL     | LEG   | 1   | NO-BIAS  | ASTER/ASTER | 3         | 1        | 0         | 0    | 1      | 0          | 1               | 0    | 1               | 1            | 0           | 0        | 01.10.2012 | 01.10.2019 | -0.374 | 10.41          | 0            |
| BAL     | LEG   | 1   | NO-CO    | ASTER/ASTER | 3         | 1        | 0         | 0    | 1      | 0          | 0               | 1    | 1               | 1            | 0           | 0        | 01.10.2012 | 01.10.2019 | 1.979  | 23.64          | 0            |
| BAL     | UST   | 2   | CTL      | ASTER/ASTER | 2         | 1        | 0         | 1    | 0      | 0          | 1               | 1    | 1               | 1            | 0           | 0        | 20.08.2012 | 11.10.2019 | -0.513 | 2.28           | 1            |
| BAL     | UST   | 2   | NO-CO    | ASTER/ASTER | 2         | 1        | 0         | 1    | 0      | 0          | 0               | 0    | 1               | 1            | 0           | 0        | 20.08.2012 | 11.10.2019 | 0.006  | 2.53           | 0            |
| BAL     | UST   | 2   | NO-GAP   | ASTER/ASTER | 2         | 1        | 0         | 1    | 0      | 0          | 1               | 1    | 0               | 0            | 0           | 0        | 20.08.2012 | 11.10.2019 | -0.63  | 2.6            | 0            |
| BAL     | UGA   | 1   | CTL      | ASTER/ASTER | 2         | 1        | 0         | 1    | 0      | 0          | 1               | 1    | 1               | 1            | 0           | 0        | 10.10.2013 | 11.10.2019 | -0.366 | 0.224          | 0            |
| BAL     | UGA   | 2   | CTL      | ASTER/ASTER | 6         | 1        | 0         | 0    | 1      | 0          | 1               | 1    | 1               | 1            | 0           | 0        | 28.09.2012 | 10.04.2019 | -0.36  | 0.182          | 0            |
| BAL     | UGA   | 3   | CTL      | ASTER/ASTER | 45        | 1        | 0         | 0    | 0      | 1          | 1               | 1    | 1               | 1            | 0           | 1        | 01.10.2011 | 01.10.2019 | 0.055  | 0.109          | 1            |
| BAL     | UGA   | 4   | CTL      | ASTER/ASTER | 119       | 1        | 0         | 0    | 0      | 1          | 1               | 1    | 1               | 1            | 0           | 1        | 01.10.2011 | 01.10.2019 | -0.17  | 0.033          | 1            |
| BAL     | UGA   | 1   | NO-BIAS  | ASTER/ASTER | 2         | 1        | 0         | 1    | 0      | 0          | 1               | 0    | 1               | 1            | 0           | 0        | 10.10.2013 | 11.10.2019 | -0.478 | 0.226          | 0            |
| BAL     | UGA   | 2   | NO-BIAS  | ASTER/ASTER | 6         | 1        | 0         | 0    | 1      | 0          | 1               | 0    | 1               | 1            | 0           | 0        | 28.09.2012 | 10.04.2019 | -0.064 | 0.185          | 0            |
| BAL     | UGA   | 3   | NO-BIAS  | ASTER/ASTER | 45        | 1        | 0         | 0    | 0      | 1          | 1               | 0    | 1               | 1            | 0           | 1        | 01.10.2011 | 01.10.2019 | 0.181  | 0.116          | 0            |
| BAL     | UGA   | 1   | NO-CO    | ASTER/ASTER | 2         | 1        | 0         | 1    | 0      | 0          | 0               | 1    | 1               | 1            | 0           | 0        | 10.10.2013 | 11.10.2019 | 11.964 | 1.291          | 0            |
| BAL     | UGA   | 2   | NO-CO    | ASTER/ASTER | 6         | 1        | 0         | 0    | 1      | 0          | 0               | 1    | 1               | 1            | 0           | 0        | 28.09.2012 | 10.04.2019 | 6.182  | 0.712          | 0            |
| BAL     | UGA   | 3   | NO-CO    | ASTER/ASTER | 45        | 1        | 0         | 0    | 0      | 1          | 0               | 1    | 1               | 1            | 0           | 1        | 01.10.2011 | 01.10.2019 | -2.761 | 0.311          | 0            |
| BAL     | UGA   | 1   | NO-FIL   | ASTER/ASTER | 2         | 1        | 0         | 1    | 0      | 0          | 1               | 1    | 0               | 1            | 0           | 0        | 10.10.2013 | 11.10.2019 | -0.505 | 0.226          | 0            |
| BAL     | UGA   | 2   | NO-FIL   | ASTER/ASTER | 6         | 1        | 0         | 0    | 1      | 0          | 1               | 1    | 0               | 1            | 0           | 0        | 28.09.2012 | 10.04.2019 | -0.483 | 0.183          | 0            |
| BAL     | UGA   | 3   | NO-FIL   | ASTER/ASTER | 45        | 1        | 0         | 0    | 0      | 1          | 1               | 1    | 0               | 1            | 0           | 1        | 01.10.2011 | 01.10.2019 | 0.086  | 0.109          | 0            |
| BAL     | UGA   | 1   | NO-GAP   | ASTER/ASTER | 2         | 1        | 0         | 1    | 0      | 0          | 1               | 1    | 0               | 0            | 0           | 0        | 10.10.2013 | 11.10.2019 | -0.797 | 0.231          | 0            |
| BAL     | UGA   | 2   | NO-GAP   | ASTER/ASTER | 6         | 1        | 0         | 0    | 1      | 0          | 1               | 1    | 0               | 0            | 0           | 0        | 28.09.2012 | 10.04.2019 | -0.758 | 0.189          | 0            |
| BAL     | UGA   | 3   | NO-GAP   | ASTER/ASTER | 45        | 1        | 0         | 0    | 0      | 1          | 1               | 1    | 0               | 0            | 0           | 1        | 01.10.2011 | 01.10.2019 | -0.053 | 0.109          | 0            |
| BAL     | USG   | 1   | CTL      | ASTER/ASTER | 2         | 1        | 0         | 1    | 0      | 0          | 1               | 0    | 0               | 1            | 0           | 0        | 06.05.2011 | 12.10.2019 | -3.38  | 15.6           | 1            |
| BAL     | USG   | 1   | NO-CO    | ASTER/ASTER | 2         | 1        | 0         | 1    | 0      | 0          | 0               | 0    | 0               | 0            | 0           | 0        | 06.05.2011 | 12.10.2019 | 0.26   | 15.7           | 0            |
| BAL     | USG   | 1   | NO-GAP   | ASTER/ASTER | 2         | 1        | 0         | 1    | 0      | 0          | 1               | 0    | 0               | 0            | 0           | 0        | 06.05.2011 | 12.10.2019 | -3.33  | 11.7           | 0            |
| BAL     | ETH   | 1   | CTL      | ASTER/ASTER | 0         | 0        | 1         | 0    | 0      | 1          | 1               | 1    | 1               | 1            | 0           | 1        | 01.10.2012 | 01.10.2019 | -0.037 | 2.472          | 1            |
| BAL     | GAC   | 2   | CTL      | TDX/TDX     | 6         | 1        | 0         | 0    | 1      | 0          | 1               | 1    | 1               | 1            | 1           | 1        | 20.02.2012 | 15.01.2020 | -3.63  | 14.05          | 1            |
| BAL     | GAC   | 2   | NO-BIAS  | TDX/TDX     | 6         | 1        | 0         | 0    | 1      | 0          | 1               | 0    | 1               | 1            | 1           | 0        | 20.02.2012 | 15.01.2020 | -0.83  | 13.85          | 0            |
| BAL     | GAC   | 2   | NO-CO    | TDX/TDX     | 6         | 1        | 0         | 0    | 1      | 0          | 0               | 1    | 1               | 1            | 1           | 0        | 20.02.2012 | 15.01.2020 | -3.6   | 13.89          | 0            |
| BAL     | GAC   | 2   | NO-FIL   | TDX/TDX     | 6         | 1        | 0         | 0    | 1      | 0          | 1               | 1    | 0               | 0            | 1           | 0        | 20.02.2012 | 15.01.2020 | -19    | 137.67         | 0            |
| BAL     | GAC   | 2   | NO-GAP   | TDX/TDX     | 6         | 1        | 0         | 0    | 1      | 0          | 1               | 1    | 0               | 0            | 1           | 0        | 20.02.2012 | 15.01.2020 | -3.48  | 17.5           | 0            |
| BAL     | GAC   | 2   | NO-PEN   | TDX/TDX     | 6         | 1        | 0         | 0    | 1      | 0          | 1               | 1    | 1               | 1            | 0           | 0        | 20.02.2012 | 15.01.2020 | -3.18  | 14.13          | 0            |
| BAL     | GAC   | 1   | SEAS     | TDX/TDX     | 6         | 1        | 0         | 0    | 1      | 0          | 1               | 1    | 1               | 1            | 1           | 0        | 20.02.2012 | 15.01.2020 | -3.53  | 14.06          | 0            |
| BAL     | FAU   | 1   | CTL      | ASTER/ASTER | 30        | 1        | 0         | 0    | 1      | 0          | 1               | 1    | 1               | 1            | 0           | 0        | 28.03.2011 | 26.07.2020 | -4.05  | 0.142          | 1            |
| BAL     | FAU   | 3   | CTL      | TDX/TDX     | 6         | 1        | 0         | 0    | 1      | 0          | 1               | 1    | 1               | 1            | 0           | 0        | 09.02.2012 | 18.09.2018 | -0.398 | 0.079          | 1            |
| BAL     | FAU   | 3   | NO-CO    | TDX/TDX     | 6         | 1        | 0         | 0    | 1      | 0          | 0               | 1    | 1               | 1            | 0           | 0        | 09.02.2012 | 18.09.2018 | 7.411  | 0.659          | 0            |
| BAL     | FAU   | 3   | NO-FIL   | TDX/TDX     | 6         | 1        | 0         | 0    | 1      | 0          | 1               | 1    | 0               | 1            | 0           | 0        | 09.02.2012 | 18.09.2018 | -0.466 | 0.079          | 0            |
| BAL     | FAU   | 3   | NO-GAP   | TDX/TDX     | 6         | 1        | 0         | 0    | 1      | 0          | 1               | 1    | 1               | 0            | 0           | 0        | 09.02.2012 | 18.09.2018 | -0.308 | 0.079          | 0            |
| BAL     | TAR   | 2   |          |             |           |          |           |      |        |            |                 |      |                 |              |             |          | 01.10.2011 | 01.10.2019 |        |                |              |

**Table S21.** Experiment results for the eastern part of the Northern Patagonian Icefield (NPI) for the target period from 2000 to 2014.

For each group and run, a summary of data and workflow (0: no; 1: yes) is provided together with survey dates (DD.MM.YYYY) and corresponding elevation changes (dh) in metre.

Uncertainties are reported in metre and at 95% confidence levels. Results reported as low confidence as well as sensitivity runs (e.g., NO-CO: no co-registration) have a quality flag of 0.

Start and end dates of the target period (TAR) are given in the last row.

| GLACIER | GROUP | RUN | RUN_NAME               | SOURCE      | DEM_COUNT | PROVIDED | PROCESSED | PAIR | MOSAIC | TIMESERIES | CO-REGISTRATION | BIAS | NOISE_FILTERING | VOID_FILLING | PENETRATION | TEMPORAL | START_DATE | END_DATE   | dh      | dh_UNCERTAINTY | QUALITY_FLAG |
|---------|-------|-----|------------------------|-------------|-----------|----------|-----------|------|--------|------------|-----------------|------|-----------------|--------------|-------------|----------|------------|------------|---------|----------------|--------------|
| NPI     | ETH   | 1   | CTL                    | ASTER/ASTER |           | 0        | 1         | 0    | 0      | 1          | 1               | 1    | 1               | 1            | 0           | 1        | 01.02.2000 | 01.03.2014 | -12.843 | 4.337          | 1            |
| NPI     | FAU   | 1   | CTL                    | SRTM/TDX    |           | 1        | 0         | 0    | 1      | 0          | 1               | 1    | 1               | 1            | 0           | 0        | 16.02.2000 | 16.04.2014 | -11.045 | 0.099          | 1            |
| NPI     | UST   | 1   | CTL                    | SRTM/ASTER  |           | 1        | 0         | 0    | 1      | 0          | 1               | 1    | 1               | 1            | 0           | 0        | 16.02.2000 | 24.03.2014 | -13.992 | 5.816          | 1            |
| NPI     | UST   | 2   | CTL                    | SRTM/ASTER  |           | 1        | 0         | 0    | 1      | 0          | 1               | 1    | 1               | 1            | 0           | 0        | 16.02.2000 | 24.03.2014 | -13.35  | 5.816          | 1            |
| NPI     | UST   | 3   | CTL                    | SRTM/ASTER  |           | 1        | 0         | 0    | 1      | 0          | 1               | 1    | 1               | 1            | 0           | 0        | 16.02.2000 | 24.03.2014 | -15.509 | 5.816          | 1            |
| NPI     | UST   | 4   | CTL                    | SRTM/ASTER  |           | 1        | 0         | 0    | 1      | 0          | 1               | 1    | 1               | 1            | 0           | 0        | 16.02.2000 | 24.03.2014 | -15.853 | 5.816          | 1            |
| NPI     | UST   | 1   | NO-BIAS/NO-OUTL/NO-FIL | SRTM/ASTER  |           | 1        | 0         | 0    | 1      | 0          | 1               | 0    | 0               | 0            | 0           | 0        | 16.02.2000 | 24.03.2014 | -7.781  | 5.949          | 0            |
| NPI     | UST   | 1   | NOFIL                  | SRTM/ASTER  |           | 1        | 0         | 0    | 1      | 0          | 1               | 1    | 0               | 1            | 0           | 0        | 16.02.2000 | 24.03.2014 | -10.055 | 5.816          | 0            |
| NPI     | UGA   | 1   | CTL                    | ASTER/ASTER |           | 1        | 0         | 0    | 0      | 1          | 1               | 1    | 1               | 1            | 0           | 1        | 02.05.2000 | 07.04.2014 | -14.934 | 0.85           | 1            |
| NPI     | UGA   | 2   | CTL                    | ASTER/ASTER |           | 1        | 0         | 0    | 0      | 1          | 1               | 1    | 1               | 1            | 0           | 1        | 02.05.2000 | 25.03.2021 | -17.02  | 0.779          | 1            |
| NPI     | UGA   | 1   | NO-BIAS                | ASTER/ASTER |           | 1        | 0         | 0    | 0      | 1          | 1               | 0    | 1               | 1            | 0           | 1        | 02.05.2000 | 07.04.2014 | -15.334 | 0.954          | 0            |
| NPI     | UGA   | 1   | NO-CO                  | ASTER/ASTER |           | 1        | 0         | 0    | 0      | 1          | 0               | 1    | 1               | 1            | 0           | 1        | 02.05.2000 | 07.04.2014 | -33.592 | 1.9            | 0            |
| NPI     | UGA   | 1   | NO-FILT                | ASTER/ASTER |           | 1        | 0         | 0    | 0      | 1          | 1               | 1    | 0               | 1            | 0           | 1        | 02.05.2000 | 07.04.2014 | -14.93  | 0.85           | 0            |
| NPI     | UGA   | 1   | NO-GAP                 | ASTER/ASTER |           | 1        | 0         | 0    | 0      | 1          | 1               | 1    | 1               | 0            | 0           | 1        | 02.05.2000 | 07.04.2014 | -16.073 | 0.88           | 0            |
| NPI     | TAR   | 1   |                        |             |           |          |           |      |        |            |                 |      |                 |              |             |          | 01.02.2000 | 01.03.2014 |         |                |              |

**Table S22.** Experiment results for the eastern part of the Northern Patagonian Icefield (NPI) for the target period from 2014 to 2019.

For each group and run, a summary of data and workflow (0: no; 1: yes) is provided together with survey dates (DD.MM.YYYY) and corresponding elevation changes (dh) in metre.

Uncertainties are reported in metre and at 95% confidence levels. Results reported as low confidence as well as sensitivity runs (e.g., NO-CO: no co-registration) have a quality flag of 0.

Start and end dates of the target period (TAR) are given in the last row.

| GLACIER | GROUP | RUN | RUN_NAME               | SOURCE      | DEM_COUNT | PROVIDED | PROCESSED | PAIR | MOSAIC | TIMESERIES | CO-REGISTRATION | BIAS | NOISE_FILTERING | VOID_FILLING | PENETRATION | TEMPORAL | START_DATE | END_DATE   | dh      | dh_UNCERTAINTY | QUALITY_FLAG |
|---------|-------|-----|------------------------|-------------|-----------|----------|-----------|------|--------|------------|-----------------|------|-----------------|--------------|-------------|----------|------------|------------|---------|----------------|--------------|
| NPI     | ETH   | 1   | CTL                    | ASTER/ASTER |           | 0        | 1         | 0    | 0      | 1          | 1               | 1    | 1               | 1            | 0           | 1        | 01.03.2014 | 01.03.2019 | -6.725  | 3.393          | 1            |
| NPI     | FAU   | 2   | CTL                    | TDX/TDX     |           | 1        | 0         | 0    | 1      | 0          | 1               | 1    | 1               | 1            | 0           | 0        | 16.04.2014 | 30.03.2019 | -8.201  | 0.076          | 1            |
| NPI     | UST   | 5   | CTL                    | ASTER/TDX   | 5         | 1        | 0         | 0    | 1      | 0          | 1               | 1    | 1               | 1            | 0           | 0        | 24.03.2014 | 04.03.2019 | -6.845  | 4.169          | 1            |
| NPI     | UST   | 6   | CTL                    | ASTER/TDX   | 5         | 1        | 0         | 0    | 1      | 0          | 1               | 1    | 1               | 1            | 0           | 0        | 24.03.2014 | 04.03.2019 | -6.993  | 4.169          | 1            |
| NPI     | UST   | 7   | CTL                    | ASTER/TDX   | 5         | 1        | 0         | 0    | 1      | 0          | 1               | 1    | 1               | 1            | 0           | 0        | 24.03.2014 | 04.03.2019 | -7.354  | 4.169          | 1            |
| NPI     | UST   | 8   | CTL                    | ASTER/TDX   | 5         | 1        | 0         | 0    | 1      | 0          | 1               | 1    | 1               | 1            | 0           | 0        | 24.03.2014 | 04.03.2019 | -7.346  | 4.169          | 1            |
| NPI     | UST   | 5   | NO-BIAS/NO-OUTL/NO-FIL | ASTER/TDX   | 5         | 1        | 0         | 0    | 1      | 0          | 1               | 0    | 0               | 0            | 0           | 0        | 24.03.2014 | 04.03.2019 | -2.732  | 4.753          | 0            |
| NPI     | UST   | 5   | NOFIL                  | ASTER/TDX   | 5         | 1        | 0         | 0    | 1      | 0          | 1               | 1    | 0               | 0            | 0           | 0        | 24.03.2014 | 04.03.2019 | -6.505  | 4.169          | 0            |
| NPI     | UGA   | 1   | CTL                    | ASTER/ASTER |           | 1        | 0         | 0    | 0      | 1          | 1               | 1    | 1               | 1            | 0           | 1        | 07.04.2014 | 21.02.2020 | -7.868  | 0.578          | 1            |
| NPI     | UGA   | 2   | CTL                    | ASTER/ASTER |           | 1        | 0         | 0    | 0      | 1          | 1               | 1    | 1               | 1            | 0           | 1        | 07.04.2014 | 25.03.2021 | -6.057  | 0.277          | 1            |
| NPI     | UGA   | 1   | NO-BIAS                | ASTER/ASTER |           | 1        | 0         | 0    | 0      | 1          | 1               | 0    | 1               | 1            | 0           | 1        | 07.04.2014 | 21.02.2020 | -7.848  | 0.578          | 0            |
| NPI     | UGA   | 1   | NO-CO                  | ASTER/ASTER |           | 1        | 0         | 0    | 0      | 1          | 0               | 1    | 1               | 1            | 0           | 1        | 07.04.2014 | 21.02.2020 | -14.783 | 1.13           | 0            |
| NPI     | UGA   | 1   | NO-FILT                | ASTER/ASTER |           | 1        | 0         | 0    | 0      | 1          | 1               | 1    | 0               | 1            | 0           | 1        | 07.04.2014 | 21.02.2020 | -7.867  | 0.578          | 0            |
| NPI     | UGA   | 1   | NO-GAP                 | ASTER/ASTER |           | 1        | 0         | 0    | 0      | 1          | 1               | 1    | 1               | 0            | 0           | 1        | 07.04.2014 | 21.02.2020 | -8.947  | 0.603          | 0            |
| NPI     | TAR   | 2   |                        |             |           |          |           |      |        |            |                 |      |                 |              |             |          | 01.03.2014 | 01.03.2019 |         |                |              |

## References

- Abdel Jaber, W., Rott, H., Floricioiu, D., Wuite, J., and Miranda, N.: Heterogeneous spatial and temporal pattern of surface elevation change and mass balance of the Patagonian ice fields between 2000 and 2016, *The Cryosphere*, 13, 2511–2535, <https://doi.org/10.5194/tc-13-2511-2019>, 2019.
- Agarwal, V., Bolch, T., Syed, T. H., Pieczonka, T., Strozzi, T., and Nagaich, R.: Area and mass changes of Siachen Glacier (East Karakoram), *J. Glaciol.*, 63, 148–163, <https://doi.org/10.1017/jog.2016.127>, 2017.
- Berthier, E., Vincent, C., Magnússon, E., Gunnlaugsson, Á. Þ., Pitte, P., Le Meur, E., Masiokas, M., Ruiz, L., Pálsson, F., Belart, J. M. C., and Wagnon, P.: Glacier topography and elevation changes derived from Pléiades sub-meter stereo images, *The Cryosphere*, 8, 2275–2291, <https://doi.org/10.5194/tc-8-2275-2014>, 2014.
- Berthier, E., Cabot, V., Vincent, C., and Six, D.: Decadal Region-Wide and Glacier-Wide Mass Balances Derived from Multi-Temporal ASTER Satellite Digital Elevation Models. Validation over the Mont-Blanc Area, *Front. Earth Sci.*, 4, <https://doi.org/10.3389/feart.2016.00063>, 2016.
- Bollmann, E., Girmair, A., Mitterer, S., Krainer, K., Sailer, R., and Stötter, J.: A Rock Glacier Activity Index Based on Rock Glacier Thickness Changes and Displacement Rates Derived From Airborne Laser Scanning: Rock Glacier Activity Index, *Permafrost and Periglac. Process.*, 26, 347–359, <https://doi.org/10.1002/ppp.1852>, 2015.
- Buchhorn, M., Lesiv, M., Tsendbazar, N.-E., Herold, M., Bertels, L., and Smets, B.: Copernicus Global Land Cover Layers—Collection 2, *Remote Sensing*, 12, 1044, <https://doi.org/10.3390/rs12061044>, 2020.
- Dussaillant, I., Berthier, E., Brun, F., Masiokas, M., Hugonnet, R., Favier, V., Rabatel, A., Pitte, P., and Ruiz, L.: Two decades of glacier mass loss along the Andes, *Nat. Geosci.*, 12, 802–808, <https://doi.org/10.1038/s41561-019-0432-5>, 2019.
- Dussaillant, I., Bannwart, J., Paul, F., and Zemp, M.: Glacier mass change global gridded data from 1976 to present derived from the Fluctuations of Glaciers Database., *World Glacier Monitoring Service*, 2023.
- Fischer, M., Huss, M., and Hoelzle, M.: Surface elevation and mass changes of all Swiss glaciers 1980–2010, *The Cryosphere*, 9, 525–540, <https://doi.org/10.5194/tc-9-525-2015>, 2015.
- Fritz, T., Rossi, C., Yague-Martinez, N., Rodriguez-Gonzalez, F., Lachaise, M., and Breit, H.: Interferometric processing of TanDEM-X data, in: 2011 IEEE International Geoscience and Remote Sensing Symposium, IGARSS 2011 - 2011 IEEE International Geoscience and Remote Sensing Symposium, Vancouver, BC, Canada, 2428–2431, <https://doi.org/10.1109/IGARSS.2011.6049701>, 2011.
- Gardelle, J., Berthier, E., Arnaud, Y., and Käab, A.: Region-wide glacier mass balances over the Pamir-Karakoram-Himalaya during 1999–2011, *The Cryosphere*, 7, 1263–1286, <https://doi.org/10.5194/tc-7-1263-2013>, 2013.
- Girod, L., Nuth, C., Käab, A., McNabb, R., and Galland, O.: MMASTER: Improved ASTER DEMs for Elevation Change Monitoring, *Remote Sensing*, 9, 704, <https://doi.org/10.3390/rs9070704>, 2017.
- González, C., Bachmann, M., Bueso-Bello, J.-L., Rizzoli, P., and Zink, M.: A Fully Automatic Algorithm for Editing the TanDEM-X Global DEM, *Remote Sensing*, 12, 3961, <https://doi.org/10.3390/rs12233961>, 2020.
- Guillet, G. and Bolch, T.: Bayesian estimation of glacier surface elevation changes from DEMs. *Frontiers in Earth Science*, 11, p.1076732, <https://doi.org/10.3389/feart.2023.1076732>, 2023

- Höhle, J. and Höhle, M.: Accuracy assessment of digital elevation models by means of robust statistical methods, *ISPRS Journal of Photogrammetry and Remote Sensing*, 64, 398–406, <https://doi.org/10.1016/j.isprsjprs.2009.02.003>, 2009.
- Hugonnet, R., McNabb, R., Berthier, E., Menounos, B., Nuth, C., Girod, L., Farinotti, D., Huss, M., Dussaillant, I., Brun, F., and Kääb, A.: Accelerated global glacier mass loss in the early twenty-first century, *Nature*, 592, 726–731, <https://doi.org/10.1038/s41586-021-03436-z>, 2021.
- Hugonnet, R., Brun, F., Berthier, E., Dehecq, A., Mannerfelt, E. S., Eckert, N., and Farinotti, D.: Uncertainty Analysis of Digital Elevation Models by Spatial Inference From Stable Terrain, *IEEE J. Sel. Top. Appl. Earth Observations Remote Sensing*, 15, 6456–6472, <https://doi.org/10.1109/JSTARS.2022.3188922>, 2022.
- Kumar, A., Dasgupta, A., Lokhande, S., and Ramsankaran, R.: Benchmarking the Indian National CartoDEM against SRTM for 1D hydraulic modelling, *International Journal of River Basin Management*, 17, 479–488, <https://doi.org/10.1080/15715124.2019.1606816>, 2019.
- Lin, H., Li, G., Cuo, L., Hooper, A., and Ye, Q.: A decreasing glacier mass balance gradient from the edge of the Upper Tarim Basin to the Karakoram during 2000–2014, *Sci Rep*, 7, 6712, <https://doi.org/10.1038/s41598-017-07133-8>, 2017.
- Magnússon, E., Muñoz-Cobo Belart, J., Pálsson, F., Ágústsson, H., and Crochet, P.: Geodetic mass balance record with rigorous uncertainty estimates deduced from aerial photographs and lidar data – Case study from Drangajökull ice cap, NW Iceland, *The Cryosphere*, 10, 159–177, <https://doi.org/10.5194/tc-10-159-2016>, 2016.
- McNabb, R., Nuth, C., Kääb, A., and Girod, L.: Sensitivity of glacier volume change estimation to DEM void interpolation, *The Cryosphere*, 13, 895–910, <https://doi.org/10.5194/tc-13-895-2019>, 2019.
- McNeil, C., O’Neel, S., Loso, M., Pelto, M., Sass, L., Baker, E. H., and Campbell, S.: Explaining mass balance and retreat dichotomies at Taku and Lemon Creek Glaciers, Alaska, *J. Glaciol.*, 66, 530–542, <https://doi.org/10.1017/jog.2020.22>, 2020.
- Nuth, C. and Kääb, A.: Co-registration and bias corrections of satellite elevation data sets for quantifying glacier thickness change, *The Cryosphere*, 5, 271–290, <https://doi.org/10.5194/tc-5-271-2011>, 2011.
- O’Neel, S., McNeil, C., Sass, L. C., Florentine, C., Baker, E. H., Peitzsch, E., McGrath, D., Fountain, A. G., and Fagre, D.: Reanalysis of the US Geological Survey Benchmark Glaciers: long-term insight into climate forcing of glacier mass balance, *J. Glaciol.*, 65, 850–866, <https://doi.org/10.1017/jog.2019.66>, 2019.
- Paul, F., Barrand, N. E., Baumann, S., Berthier, E., Bolch, T., Casey, K., Frey, H., Joshi, S. P., Konovalov, V., Le Bris, R., Mölg, N., Nosenko, G., Nuth, C., Pope, A., Racoviteanu, A., Rastner, P., Raup, B., Scharrer, K., Steffen, S., and Winsvold, S.: On the accuracy of glacier outlines derived from remote-sensing data, *Ann. Glaciol.*, 54, 171–182, <https://doi.org/10.3189/2013AoG63A296>, 2013.
- Pfeifer, N., Mandlbürger, G., Otepka, J., and Karel, W.: OPALS – A framework for Airborne Laser Scanning data analysis, *Computers, Environment and Urban Systems*, 45, 125–136, <https://doi.org/10.1016/j.compenvurbsys.2013.11.002>, 2014.
- Pieczonka, T. and Bolch, T.: Region-wide glacier mass budgets and area changes for the Central Tien Shan between ~1975 and 1999 using Hexagon KH-9 imagery, *Global and Planetary Change*, 128, 1–13, <https://doi.org/10.1016/j.gloplacha.2014.11.014>, 2015.
- RGI Consortium: Randolph Glacier Inventory - a dataset of global glacier outlines: version 6.0, technical report., Global Land Ice Measurements from Space, Colorado, USA. Digital Media. DOI: 10.7265/N5-RGI-60, 2017.



Rolstad, C., Haug, T., and Denby, B.: Spatially integrated geodetic glacier mass balance and its uncertainty based on geostatistical analysis: application to the western Svartisen ice cap, Norway, *J. Glaciol.*, 55, 666–680, <https://doi.org/10.3189/002214309789470950>, 2009.

Schweisshelm, B., Lachaise, M., and Fritz, T.: Change Detection Within the Processing of the TanDEM-X Change DEM, in: 2021 IEEE International Geoscience and Remote Sensing Symposium IGARSS, IGARSS 2021 - 2021 IEEE International Geoscience and Remote Sensing Symposium, Brussels, Belgium, 2130–2133, <https://doi.org/10.1109/IGARSS47720.2021.9554010>, 2021.

Shean, D. E., Alexandrov, O., Moratto, Z. M., Smith, B. E., Joughin, I. R., Porter, C., and Morin, P.: An automated, open-source pipeline for mass production of digital elevation models (DEMs) from very-high-resolution commercial stereo satellite imagery, *ISPRS Journal of Photogrammetry and Remote Sensing*, 116, 101–117, <https://doi.org/10.1016/j.isprsjprs.2016.03.012>, 2016.

Wagnon, P., Brun, F., Khadka, A., Berthier, E., Shrestha, D., Vincent, C., Arnaud, Y., Six, D., Dehecq, A., Ménégoz, M., and Jomelli, V.: Reanalysing the 2007–19 glaciological mass-balance series of Mera Glacier, Nepal, Central Himalaya, using geodetic mass balance, *J. Glaciol.*, 67, 117–125, <https://doi.org/10.1017/jog.2020.88>, 2021.

Zemp, M., Jansson, P., Holmlund, P., Gärtner-Roer, I., Koblet, T., Thee, P., and Haeberli, W.: Reanalysis of multi-temporal aerial images of Storglaciären, Sweden (1959–99) – Part 2: Comparison of glaciological and volumetric mass balances, *The Cryosphere*, 4, 345–357, <https://doi.org/10.5194/tc-4-345-2010>, 2010.

Zemp, M., Huss, M., Thibert, E., Eckert, N., McNabb, R., Huber, J., Barandun, M., Machguth, H., Nussbaumer, S. U., Gärtner-Roer, I., Thomson, L., Paul, F., Maussion, F., Kutuzov, S., and Cogley, J. G.: Global glacier mass changes and their contributions to sea-level rise from 1961 to 2016, *Nature*, 568, 382–386, <https://doi.org/10.1038/s41586-019-1071-0>, 2019.
